# Supplementary material
Source: PubMed Central journal article supplement (PMC6990720)
Supplement: jamaoncol-6-358-s002.pdf [file jamaoncol-6-358-s002.pdf]

## Supplementary Online Content

Shen S, Chen X, Cai J, et al. Effect of dasatinib vs imatinib in the treatment of pediatric Philadelphia chromosome–positive acute lymphoblastic leukemia: a randomized clinical trial. *JAMA Oncol*. Published online January 16, 2020. doi:10.1001/jamaoncol.2019.5868

**eMethods.** Trial Design and Oversight and Statistical Methods

**eTable 1.** Criteria for Classification of Risk Groups

**eTable 2.** Remission Induction, Consolidation, and Continuation/Reinduction Therapy

**eTable 3.** Baseline Demographic and Disease Characteristics of the Patients

**eTable 4.** Comparison of Minimal Residual Disease Levels on Day 19 and Day 46 of Remission Induction Between Patient’s Intent-to-Treat With Dasatinib or Imatinib

**eTable 5.** Univariate Cox Proportional Hazards Rate Regression Analysis of Event-Free Survival Within Each Treatment Arm

**eTable 6.** Baseline Demographic and Disease Characteristics of As-Treated Patients

**eTable 7.** Comparison of Minimal Residual Disease Levels on Day 19 and Day 46 of Remission Induction Between Patients As-Treated With Dasatinib or Imatinib

**eTable 8.** Multivariable Cox Proportional Hazards Regression Analysis of Event-Free Survival Among As-Treated Patients With Treatment Abandonment and Refusal of Protocol Treatment Considered as Adverse Events

**eTable 9.** Comparison of Toxicity Between Patients As-Treated With Dasatinib or Imatinib

**eFigure 1.** Survival by As-Treated Groups

**eFigure 2.** Cumulative Risk by As-Treated Groups

**eFigure 3.** Event-Free and Overall Survival of Patients Treated in St Jude Total XVI Study

**eAppendix.** Run-time Printout Log

This supplementary material has been provided by the authors to give readers additional information about their work.

## **eMethods. Trial Design and Oversight and Statistical Methods**

### **Trial Design and Oversight**

In the statistical design, the test used to assess power was two-sided log-rank test at the 0.05 significance level. The sample size was determined on the basis of both accrual rate and time (feasibility), and statistical power. Based on the historical data, we anticipated that it was feasible to enroll 204 patients in 3 years, and then based on this sample size and the desired effect size, we calculated the statistical power. Clinically, we wished to gain 10% in the event-free survival rate. Design of the interim analysis was based on the inclusion-exclusion principle. Essentially, if the type-I error probability at the first test (interim analysis) is  $\leq 0.01$  and that at the second test (final analysis) is  $\leq 0.05$ , then by the inclusion-exclusion principle, the overall type-I error probability of the study is no bigger than 0.06.

### **Statistical Methods**

Most of the analyses included all eligible patients. There were few analyses, mainly those involving minimal residual disease (MRD), that lacked data for up to 6 patients. Because MRD is affected by very complex biological processes, reliable imputation of its value is impossible by the available methods. Therefore, in the analyses involving MRD, cases with missing data were excluded (rather than imputed). Multiple imputation was not applied in this study.

## **eTable 1. Criteria for Classification of Risk Groups**

### **Criteria for low-risk ALL**

- B-cell ALL meeting one of the following criteria:
  1. Age  $\geq$  365 days and  $<$  10 years and presenting leukocyte count  $\leq 50 \times 10^9/L$ ; or
  2. Hyperdiploidy with chromosome number  $\geq 50$  or DNA index  $\geq 1.16$ ; or
  3. *ETV6-RUNX1* gene fusion positive
  
- MUST not have:
  1. CNS-3 status ( $\geq 5$  leukocytes/ $\mu L$  of cerebrospinal fluid with morphologically identifiable blasts or cranial nerve palsy)
  2. Overt testicular leukemia (as evidenced by ultrasonogram).
  3. Adverse genetic features: t(9;22) or *BCR-ABL1* fusion; t(1;19) or *TCF3-PBX1* fusion; rearranged *KMT2A* (as measured by FISH and / or PCR); or hypodiploidy ( $<44$  chromosomes); iAMP21
  4. Poor early response with day 19 minimal residual disease (MRD)  $\geq 1\%$  OR day 19 MRD  $\geq 0.01\%$  and day 46 MRD  $\geq 0.01\%$

### **Criteria for intermediate-risk ALL**

1. T-cell ALL
2. Philadelphia chromosome-positive ALL
3. Presence of rearranged *KMT2A* with age  $\geq 6$  months at presentation OR presenting leukocyte count  $< 300 \times 10^9/L$
4. Hypodiploidy with chromosome number  $< 44$
5. All cases that do not meet the criteria for low risk or high risk

### **Criteria for high-risk ALL**

1. Intermediate risk patient with induction failure (presence of  $\geq 5\%$  blast by morphologic assessment of bone marrow aspirate on day 46 for patients without MRD marker) OR MRD  $\geq 1\%$  on day 46
2. Infants  $<6$  months with *KMT2A* rearrangement and presenting leukocyte count  $\geq 300 \times 10^9/L$ .

**eTable 2. Remission Induction, Consolidation, and Continuation/Reinduction Therapy**

**A: Remission induction therapy**

| Agents                                                                  | Dosages and routes                                                            | No. Doses | Schedules                     |
|-------------------------------------------------------------------------|-------------------------------------------------------------------------------|-----------|-------------------------------|
| <b>All participants</b>                                                 |                                                                               |           |                               |
| Dexamethasone                                                           | 6 mg/m <sup>2</sup> per day orally or IV (b.i.d.)                             |           | Days 1-4                      |
| Prednisone                                                              | 45 mg/m <sup>2</sup> (60 mg/m <sup>2</sup> for T-ALL) per day orally (t.i.d.) | 84        | Days 5-28                     |
| Vincristine                                                             | 1.5 mg/m <sup>2</sup> IV (max 2 mg)                                           | 4         | Days 5, 12, 19, 26            |
| Daunorubicin                                                            | 25 mg/m <sup>2</sup> IV                                                       | 2         | Days 5 and 12                 |
| Pegaspargase                                                            | 2,000 units/m <sup>2</sup> IM                                                 | 1         | Days 6 and 26                 |
| Triple intrathecal*                                                     | Age-dependent                                                                 | 3 to 5    | Days 5, (8), 12, (15), 19, 29 |
| Cyclophosphamide                                                        | 1000 mg/m <sup>2</sup> IV over 1 hour                                         | 1         | Day 29                        |
| Cytarabine                                                              | 50 mg/m <sup>2</sup> IH every 12 hours                                        | 14        | Days 29-35                    |
| Mercaptopurine                                                          | 60 mg/m <sup>2</sup> per dose orally                                          | 7         | Days 29-33                    |
| <b>Only participants with Day 19 MRD ≥ 1% received the course below</b> |                                                                               |           |                               |
| Vincristine                                                             | 1.5 mg/m <sup>2</sup> IV (max 2 mg)                                           | 2         | Days 50 and 57                |
| Pegaspargase                                                            | 2000 units/m <sup>2</sup> IM                                                  | 1         | Day 50                        |
| Cyclophosphamide                                                        | 1000 mg/m <sup>2</sup> IV over 1 hour                                         | 1         | Day 50                        |
| Cytarabine                                                              | 50 mg/m <sup>2</sup> SQ every 12 hours                                        | 14        | Days 50-56                    |
| Mercaptopurine                                                          | 60 mg/m <sup>2</sup> /dose orally                                             | 14        | Days 22-35                    |
| Triple intrathecal                                                      | Age-dependent                                                                 | 1         | Day 50                        |

\*Triple intrathecal treatment (methotrexate 6, 9, 12.5 mg; dexamethasone 2.5, 2.5, 5 mg, and cytarabine 15, 25, 35 mg for ages <12, 12 to 35, and ≥36 months, respectively); extra triple intrathecal treatment on days 8 and 15 for patients with T-cell ALL, CNS-3 status (≥5 leukocytes/μL of cerebrospinal fluid with blasts or cranial palsy), CNS-2 status (<5 leukocytes/μL of cerebrospinal fluid with blasts) or traumatic lumbar puncture (>10 erythrocytes/μL of cerebrospinal fluid).

**B: Consolidation therapy**

| Agent                  | Dosage and Route                       | # Doses | Schedule                                                      |
|------------------------|----------------------------------------|---------|---------------------------------------------------------------|
| High-dose Methotrexate | 5.0 gm/m <sup>2</sup> IV over 24 hours | 4       | Days 1, 15, 29 and 43                                         |
| Mercaptopurine         | 25 mg/m <sup>2</sup> /day orally       | 56      | Days 1 to 56                                                  |
| Leucovorin             | 15 mg/m <sup>2</sup> IV                | 12      | 42, 48 and 54 hours after the start of high-dose methotrexate |
| Triple intrathecal     | Age-dependent                          | 4       | Days 1, 15, 29, and 43                                        |

**C: Continuation/reinduction therapy (weeks 1 to 19)**

| Week | Treatment                                                                  |
|------|----------------------------------------------------------------------------|
| 1*   | Pegaspargase + Mercaptopurine + Dexamethasone + Vincristine + Daunorubicin |
| 2    | Mercaptopurine                                                             |
| 3    | Mercaptopurine                                                             |
| 4*   | Pegaspargase + Mercaptopurine + Dexamethasone + Vincristine + Daunorubicin |
| 5    | Mercaptopurine                                                             |
| 6    | Mercaptopurine                                                             |
| 7*   | Pegaspargase + Mercaptopurine + Dexamethasone + Vincristine + Daunorubicin |
| 8    | Mercaptopurine                                                             |
| 9    | Mercaptopurine                                                             |
| 10*  | Pegaspargase + Mercaptopurine + Dexamethasone + Vincristine + Daunorubicin |
| 11   | Mercaptopurine                                                             |
| 12   | Mercaptopurine                                                             |
| 13*  | Pegaspargase + Mercaptopurine + Dexamethasone + Vincristine + Daunorubicin |
| 14   | Mercaptopurine                                                             |
| 15   | Mercaptopurine                                                             |
| 16   | Mercaptopurine                                                             |
| 17*  | Reinduction                                                                |

|    |             |
|----|-------------|
| 18 | Reinduction |
| 19 | Reinduction |

\* Triple intrathecal treatment (methotrexate 6, 9, 12.5 mg; dexamethasone 2.5, 2.5, 5 mg, and cytarabine 15, 25, 35 mg for ages <12, 12 to 35, and ≥36 months, respectively).

Pegaspargase 2000 units/m<sup>2</sup> IM; Mercaptopurine 25 mg/m<sup>2</sup> orally daily for 7 days every week; Dexamethasone 12 mg/m<sup>2</sup> orally per day in 2 divided doses for 5 days; Vincristine 1.5 mg/m<sup>2</sup> IV (max. 2 mg); Daunorubicin 25 mg/m<sup>2</sup>.

### Reinduction therapy

| Drug                         | Dose and route                          | Schedule                 |
|------------------------------|-----------------------------------------|--------------------------|
| Dexamethasone                | 8 mg/m <sup>2</sup> /day, orally, b.i.d | Days 1 - 7, Days 15 - 21 |
| Vincristine                  | 1.5 mg/m <sup>2</sup> IV (max. 2mg)     | Days 1, 8, 15            |
| Ara-C                        | 2 gm/m <sup>2</sup> , IV, q12h          | Days 1, 2                |
| Pegaspargase                 | 2,000 U/m <sup>2</sup> IM               | Day 3                    |
| Triple intrathecal treatment | Age-dependent                           | Day 1                    |

**D: Continuation (weeks 20 to 120)**

| <b>Week</b>                   | <b>Treatment</b>                                            |
|-------------------------------|-------------------------------------------------------------|
| 20                            | Mercaptopurine + Methotrexate                               |
| 21                            | Mercaptopurine + Methotrexate                               |
| 22*                           | Cyclophosphamide + Cytarabine + Dexamethasone + Vincristine |
| 23                            | No chemotherapy                                             |
| 4 weekly cycles for 5 courses |                                                             |
| 40                            | Mercaptopurine + Methotrexate                               |
| 41                            | Mercaptopurine + Methotrexate                               |
| 42                            | Mercaptopurine + Methotrexate                               |
| 43                            | Mercaptopurine + Methotrexate                               |
| 44                            | Mercaptopurine + Methotrexate                               |
| 45                            | Mercaptopurine + Methotrexate                               |
| 46                            | Cyclophosphamide + Cytarabine + Dexamethasone + Vincristine |
| 47                            | No chemotherapy                                             |
| 8 weekly cycles for 7 courses |                                                             |
| 96-111                        | Mercaptopurine + Methotrexate                               |

\* Triple intrathecal treatment (methotrexate 6, 9, 12.5 mg; Dexamethasone 2.5, 2.5, 5 mg, and cytarabine 15, 25, 35 mg for ages <12, 12 to 35, and ≥36 months, respectively) on weeks 22, 26, 30, 34 and 38.

Mercaptopurine 50 mg/m<sup>2</sup> orally daily for 7 days; Methotrexate 25 mg/m<sup>2</sup> orally on day 1; Cyclophosphamide 300 mg/m<sup>2</sup> IV on day 1; Cytarabine 300 mg/m<sup>2</sup> IV on day 1; Dexamethasone 8 mg/m<sup>2</sup> orally per day in 2 divided doses for 7 days between week 20 and 39, and then 6 mg/m<sup>2</sup> orally per day in divided doses for 7 days between week 40 and 95.

**eTable 3. Baseline Demographic and Disease Characteristics of the Patients**

| Factor                                                     | Category                          | Total<br>n (%) | Imatinib<br>n (%) | Dasatinib<br>n (%) | p value |
|------------------------------------------------------------|-----------------------------------|----------------|-------------------|--------------------|---------|
| Age (years)*                                               | <1                                | 1 (0.53)       | 1 (1.03)          | 0 (0)              | 0.82    |
|                                                            | 1 to 9                            | 126 (66.67)    | 63 (64.95)        | 63 (68.48)         |         |
|                                                            | ≥ 10                              | 62 (32.80)     | 33 (34.02)        | 29 (31.52)         |         |
| Sex                                                        | Male                              | 136 (71.96)    | 70 (72.16)        | 66 (71.74)         | 0.99    |
|                                                            | Female                            | 53 (28.04)     | 27 (27.84)        | 26 (28.26)         |         |
| Leukocyte count at<br>diagnosis†<br>(×10 <sup>3</sup> /μL) | <50                               | 75 (39.68)     | 32 (32.99)        | 43 (46.74)         | 0.12    |
|                                                            | 50 to <100                        | 32 (16.93)     | 20 (20.62)        | 12 (13.04)         |         |
|                                                            | ≥100                              | 82 (43.39)     | 45 (46.39)        | 37 (40.22)         |         |
| CNS status                                                 | CNS1                              | 170 (89.95)    | 87 (89.69)        | 83 (90.22)         | 0.99    |
|                                                            | CNS2/Traumatic<br>lumbar puncture | 13 (6.88)      | 7 (7.22)          | 6 (6.52)           |         |
|                                                            | CNS3                              | 6 (3.17)       | 3 (3.09)          | 3 (3.26)           |         |
| Lineage                                                    | B                                 | 185 (97.88)    | 95 (97.94)        | 90 (97.83)         | 0.99    |
|                                                            | T                                 | 4 (2.12)       | 2 (2.06)          | 2 (2.17)           |         |
| t(9;22) (q34;q12.2)                                        | FISH only                         | 6 (3.17)       | 1 (1.03)          | 5 (5.43)           | 0.11    |
|                                                            | RT-PCR only                       | 14 (7.41)      | 5 (5.15)          | 9 (9.78)           |         |
|                                                            | Both                              | 169 (89.42)    | 91 (93.81)        | 78 (84.78)         |         |
| <i>BCR-ABL</i>                                             | p190                              | 127 (84.11)    | 65 (82.28)        | 62 (86.11)         | 0.66    |
|                                                            | p210                              | 24 (15.89)     | 14 (17.72)        | 10 (13.89)         |         |
| Initial risk                                               | Intermediate                      | 189 (100)      | 97 (100)          | 92 (100)           | 0.99    |
|                                                            | High                              | 0 (0)          | 0 (0)             | 0 (0)              |         |
| Final risk                                                 | Intermediate                      | 184 (97.35)    | 93 (95.88)        | 91 (98.91)         | 0.37    |
|                                                            | High                              | 5 (2.65)       | 4 (4.12)          | 1 (1.09)           |         |

CNS, central nervous system; \* median, 7.8 years (IQR 5.2-11.3, range 0.8-16.8); †median, 69.9 per μL (range, 1.2-726.1).



**eTable 4. Comparison of Minimal Residual Disease Levels on Day 19 and Day 46 of Remission Induction Between Patient's Intent-to-Treat With Dasatinib or Imatinib**

| Status                                 | Category  | Total n (%) | Imatinib n (%) | Dasatinib n (%) | <i>P</i> value |
|----------------------------------------|-----------|-------------|----------------|-----------------|----------------|
| MRD, day 19                            | <0.01%    | 65 (34.57)  | 28 (29.17)     | 37 (40.22)      | 0.21           |
|                                        | 0.01%-<1% | 79 (42.02)  | 42 (43.75)     | 37 (40.22)      |                |
|                                        | 1% to <5% | 17 (9.04)   | 8 (8.33)       | 9 (9.78)        |                |
|                                        | ≥5%       | 27 (14.36)  | 18 (18.75)     | 9 (9.78)        |                |
| MRD, day 46                            | <0.01%    | 145 (78.80) | 72 (77.42)     | 73 (80.22)      | 0.51           |
|                                        | 0.01%-<1% | 34 (18.48)  | 17 (18.28)     | 17 (18.68)      |                |
|                                        | ≥1%       | 5 (2.72)    | 4 (4.30)       | 1 (1.10)        |                |
| Complete remission at end of induction | Yes       | 183 (96.83) | 92 (94.85)     | 91 (98.91)      | 0.21           |
|                                        | No        | 6 (3.17)    | 5 (5.15)       | 1 (1.09)        |                |

MRD, minimal residual disease

**eTable 5. Univariate Cox Proportional Hazards Rate Regression Analysis of Event-Free Survival Within Each Treatment Arm**

| Factor                                              | Category                       | Imatinib   |       |            |         | Dasatinib  |      |            |         |
|-----------------------------------------------------|--------------------------------|------------|-------|------------|---------|------------|------|------------|---------|
|                                                     |                                | n (%)      | HR    | 95% CI     | p value | n (%)      | HR   | 95% CI     | p value |
| Age*                                                | 1 to 9                         | 63 (65.63) |       |            |         | 63 (68.48) |      |            |         |
|                                                     | ≥ 10                           | 33 (34.38) | 2.43  | 1.16~5.10  | 0.02    | 29 (31.52) | 1.30 | 0.44~3.87  | 0.64    |
| Sex                                                 | Female                         | 27 (27.84) |       |            |         | 26 (28.26) |      |            |         |
|                                                     | Male                           | 70 (92.16) | 0.63  | 0.29~1.40  | 0.26    | 66 (71.74) | 1.15 | 0.37~3.64  | 0.81    |
| Leukocyte count at diagnosis (×10 <sup>3</sup> /μL) | <100                           | 52 (53.61) |       |            |         | 55 (59.78) |      |            |         |
|                                                     | ≥ 100                          | 45 (46.39) | 3.44  | 1.56~7.56  | 0.002   | 37 (40.22) | 3.20 | 1.09~9.37  | 0.03    |
| CNS status                                          | CNS1                           | 87 (89.69) |       |            |         | 83 (90.22) |      |            |         |
|                                                     | CNS2/Traumatic lumbar puncture | 7 (7.22)   | 1.49  | 0.45~4.95  | 0.52    | 6 (6.52)   | 0    | 0          | 0.99    |
|                                                     | CNS3                           | 3 (3.09)   | 1.76  | 0.24~13.13 | 0.58    | 3 (3.26)   | 5.10 | 1.13~22.98 | 0.03    |
| Lineage                                             | B                              | 95 (97.94) |       |            |         | 90 (97.83) |      |            |         |
|                                                     | T                              | 2 (2.06)   | 11.29 | 2.54~50.22 | 0.001   | 2 (2.17)   | 6.12 | 0.78~47.64 | 0.08    |
| BCR-ABL                                             | p190                           | 65 (82.28) |       |            |         | 62 (86.11) |      |            |         |
|                                                     | p210                           | 14 (17.72) | 0.71  | 0.21~2.40  | 0.59    | 10 (13.89) | 0.60 | 0.07~4.86  | 0.63    |
| Final risk                                          | Intermediate                   | 93 (95.88) |       |            |         | 91 (98.91) |      |            |         |
|                                                     | High                           | 4 (4.12)   | 3.07  | 0.91~10.33 | 0.07    | 1† (1.09)  | 87.5 | 5.5-1399   | 0.002   |
| MRD, day 19                                         | <5%                            | 78 (81.25) |       |            |         | 83 (90.22) |      |            |         |
|                                                     | ≥5%                            | 18 (18.75) | 2.21  | 1.01~4.83  | 0.048   | 9 (9.78)   | 3.84 | 1.22~12.09 | 0.02    |
| MRD, day 46                                         | <0.01%                         | 72 (77.42) |       |            |         | 73 (80.22) |      |            |         |
|                                                     | ≥0.01%                         | 21 (22.58) | 2.92  | 1.35~6.31  | 0.006   | 18 (19.78) | 4.21 | 1.52~11.67 | 0.006   |

\*The single infant in the imatinib group was excluded. † This high-risk patient failed to achieve remission; CNS, central nervous system; MRD, minimal residual disease; HR, hazard ratio of event-free survival

**eTable 6. Baseline Demographic and Disease Characteristics of As-Treated Patients**

| Factor                                                     | Category                        | Total n (%) | Imatinib n (%) | Dasatinib n (%) | P value |
|------------------------------------------------------------|---------------------------------|-------------|----------------|-----------------|---------|
| Age (years)                                                | <1                              | 1 (0.53)    | 1 (1.05)       | 0 (0)           | 0.99    |
|                                                            | 1 to 9                          | 126 (66.67) | 63 (66.32)     | 63 (67.02)      |         |
|                                                            | ≥ 10                            | 62 (32.80)  | 31 (32.63)     | 31 (32.98)      |         |
| Sex                                                        | Male                            | 136 (71.96) | 66 (69.47)     | 70 (74.47)      | 0.52    |
|                                                            | Female                          | 53 (28.04)  | 29 (30.53)     | 24 (25.53)      |         |
| Leukocyte count at diagnosis ( $\times 10^3/\mu\text{L}$ ) | <50                             | 75 (39.68)  | 32 (33.68)     | 43 (45.74)      | 0.21    |
|                                                            | 50 to < 100                     | 32 (16.93)  | 19 (20.00)     | 13 (13.83)      |         |
|                                                            | ≥100                            | 82 (43.39)  | 44 (46.32)     | 38 (40.43)      |         |
| CNS status                                                 | CNS-1                           | 170 (89.95) | 87 (91.58)     | 83 (88.30)      | 0.66    |
|                                                            | CNS-2/Traumatic Tap             | 13 (6.88)   | 6 (6.32)       | 7 (7.44)        |         |
|                                                            | CNS-3/Intracranial infiltration | 6 (3.17)    | 2 (2.11)       | 4 (4.26)        |         |
| Lineage                                                    | B                               | 185 (97.88) | 92 (96.84)     | 93 (98.94)      | 0.62    |
|                                                            | T                               | 4 (2.12)    | 3 (3.16)       | 1 (1.06)        |         |
| t(9;22)(q34;q11.2)                                         | FISH only                       | 6 (3.17)    | 2 (2.11)       | 4 (4.26)        | 0.37    |
|                                                            | RT-PCR only                     | 14 (7.41)   | 5 (5.26)       | 9 (9.57)        |         |
|                                                            | Both                            | 169 (89.42) | 88 (92.63)     | 81 (86.17)      |         |
| BCR-ABL                                                    | p190                            | 127 (84.11) | 62 (84.93)     | 65 (83.33)      | 0.83    |
|                                                            | p 210                           | 24 (15.89)  | 11 (15.07)     | 13 (16.67)      |         |
| Initial risk                                               | Intermediate                    | 189 (100)   | 95 (100)       | 94 (100)        | 0.99    |
|                                                            | High                            | 0 (0)       | 0 (0)          | 0 (0)           |         |
| Final risk                                                 | Intermediate                    | 184 (97.35) | 91 (95.79)     | 93 (98.94)      | 0.37    |
|                                                            | High                            | 5 (2.65)    | 4 (4.21)       | 1 (1.06)        |         |

CNS, central nervous system

**eTable 7. Comparison of Minimal Residual Disease Levels on Day 19 and Day 46 of Remission Induction Between Patients As-Treated With Dasatinib or Imatinib**

| <b>Status</b>                          | <b>Category</b> | <b>Total n (%)</b> | <b>Imatinib n (%)</b> | <b>Dasatinib n (%)</b> | <b>P value</b> |
|----------------------------------------|-----------------|--------------------|-----------------------|------------------------|----------------|
| MRD, day 19                            | <0.01%          | 65 (34.57)         | 27 (28.72)            | 38 (40.43)             | 0.09           |
|                                        | 0.01%-<1%       | 79 (42.02)         | 40 (42.55)            | 39 (41.49)             |                |
|                                        | 1% to <5%       | 17 (9.04)          | 8 (8.51)              | 9 (9.57)               |                |
|                                        | ≥5%             | 27 (14.36)         | 19 (20.21)            | 8 (8.51)               |                |
| MRD, day 46                            | <0.01%          | 145 (78.80)        | 70 (76.92)            | 75 (80.65)             | 0.46           |
|                                        | 0.01%-<1%       | 34 (18.48)         | 17 (18.68)            | 17 (18.28)             |                |
|                                        | ≥1%             | 5 (2.72)           | 4 (4.40)              | 1 (1.08)               |                |
| Complete remission at end of induction | Yes             | 183 (96.83)        | 90 (94.74)            | 93 (98.94)             | 0.21           |
|                                        | No              | 6 (3.17)           | 5 (5.26)              | 1 (1.06)               |                |

MRD, minimal residual disease

**eTable 8. Multivariable Cox Proportional Hazards Regression Analysis of Event-Free Survival Among As-Treated Patients With Treatment Abandonment and Refusal of Protocol Treatment Considered as Adverse Events**

| Factor                                              | Category                       | n* (%)      | HR   | 95% CI     | P value |
|-----------------------------------------------------|--------------------------------|-------------|------|------------|---------|
| Tyrosine kinase inhibitor                           | Dasatinib                      | 93 (50.82)  |      |            |         |
|                                                     | Imatinib                       | 90 (49.18)  | 2.67 | 1.45~4.91  | 0.002   |
| Age                                                 | 1 to 9                         | 123 (67.21) |      |            |         |
|                                                     | ≥ 10                           | 60 (32.79)  | 1.44 | 0.80~2.59  | 0.23    |
| Leukocyte count at diagnosis (×10 <sup>3</sup> /μL) | <100                           | 105 (57.38) |      |            |         |
|                                                     | ≥100                           | 78 (42.62)  | 2.23 | 1.23~4.02  | 0.008   |
| CNS status                                          | CNS1                           | 164 (89.62) |      |            |         |
|                                                     | CNS2/Traumatic lumbar puncture | 13 (7.10)   | 0.33 | 0.09~1.19  | 0.09    |
|                                                     | CNS3                           | 6 (3.28)    | 1.63 | 0.53~4.95  | 0.39    |
| Lineage                                             | B                              | 179 (97.81) |      |            |         |
|                                                     | T                              | 4 (2.19)    | 8.25 | 2.09~32.62 | 0.003   |
| Final risk                                          | Intermediate                   | 178 (97.27) |      |            |         |
|                                                     | High                           | 5 (2.73)    | 1.94 | 0.57~6.58  | 0.29    |
| MRD, day 19                                         | <5%                            | 156 (85.25) |      |            |         |
|                                                     | ≥5%                            | 27 (14.75)  | 0.65 | 0.28~1.53  | 0.32    |
| MRD, day 46                                         | <0.01%                         | 144 (78.69) |      |            |         |
|                                                     | ≥0.01%                         | 39 (21.31)  | 2.86 | 1.35~6.04  | 0.006   |

\* The single infant in the imatinib group and 5 patients without MRD results at day 46 were excluded; CNS, central-nervous-system; MRD, minimal residual disease

**eTable 9. Comparison of Toxicity Between Patients As-Treated With Dasatinib or Imatinib**

| <b>Toxicity</b>                  | <b>Imatinib<br/>n=95 (%)</b> | <b>Dasatinib<br/>n=94 (%)</b> | <b>P value</b> |
|----------------------------------|------------------------------|-------------------------------|----------------|
| Grade 5 (fatal) infection        | 5(5.26)                      | 5(5.32)                       | 0.99           |
| Grade 3/4 infection              | 26 (27.4)                    | 24 (25.5)                     | 0.87           |
| Disseminated fungal<br>infection | 7 (7.37)                     | 7 (7.45)                      | 0.99           |
| Pancreatitis                     | 8 (8.42)                     | 8 (8.51)                      | 0.99           |
| Seizure                          | 4 (4.21)                     | 4 (4.26)                      | 0.99           |
| Thrombosis                       | 1 (1.05)                     | 1 (1.06)                      | 0.99           |
| Intestinal hemorrhage            | 1 (1.05)                     | 2 (2.13)                      | 0.62           |
| Pleural effusion                 | 2 (2.11)                     | 4 (4.26)                      | 0.44           |
| Hyperbilirubinemia               | 1 (1.05)                     | 1 (1.06)                      | 0.99           |

**eFigure 1. Survival by As-Treated Groups**

(A) Event-free survival. (B) Overall survival. The hazard ratio (HR) and confidence interval, along with the P value were obtained from Cox regression modeling.

**A**

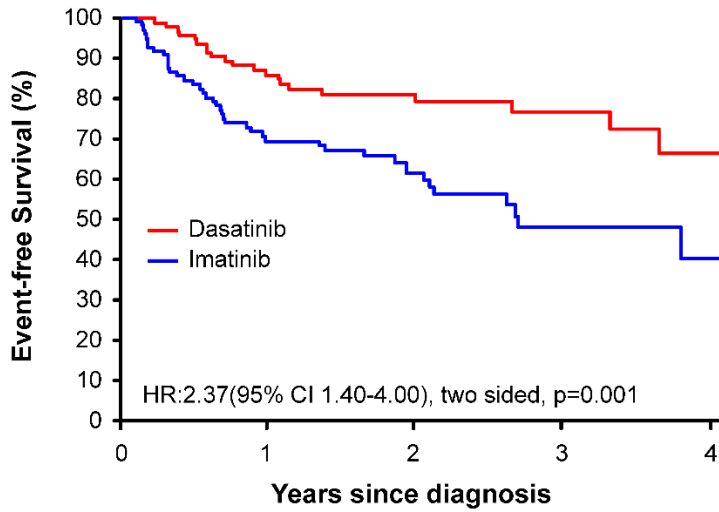

| Number at risk |    | 0  | 1  | 2  | 3 | 4 |
|----------------|----|----|----|----|---|---|
| Dasatinib      | 94 | 72 | 46 | 22 | 6 | 0 |
| Imatinib       | 95 | 61 | 40 | 10 | 0 | 0 |

**B**

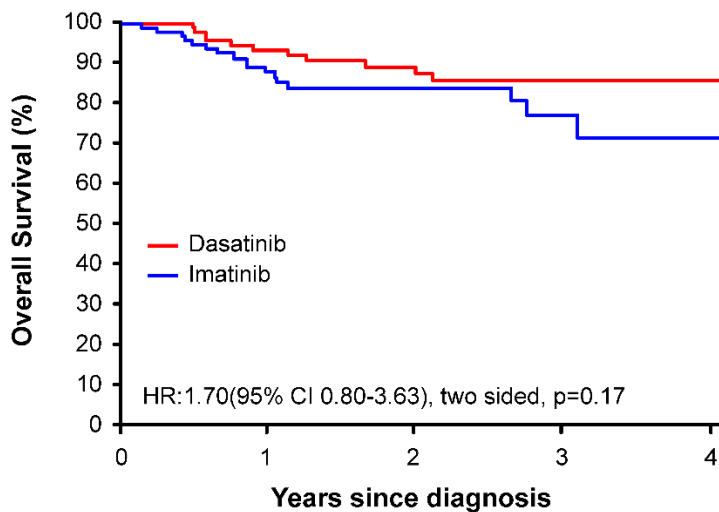

| Number at risk |    | 0  | 1  | 2  | 3 | 4 |
|----------------|----|----|----|----|---|---|
| Dasatinib      | 94 | 77 | 50 | 23 | 7 | 0 |
| Imatinib       | 95 | 72 | 48 | 13 | 0 | 0 |

## eFigure 2. Cumulative Risk by As-Treated Groups

(A) Any relapse. (B) Isolated CNS relapse. (C) Any CNS relapse (isolated plus combined with hematologic). (D) Death in remission. CNS, central nervous system.

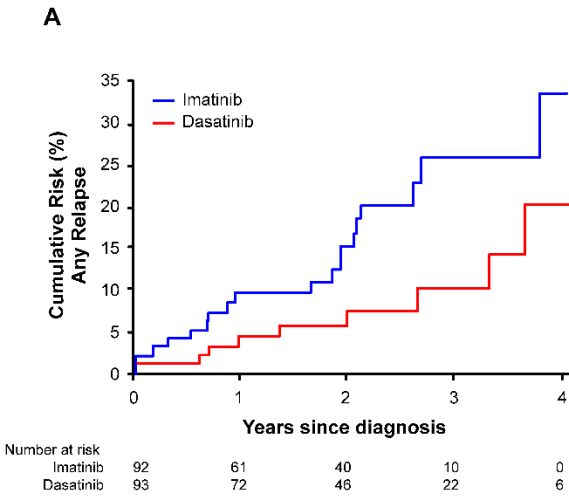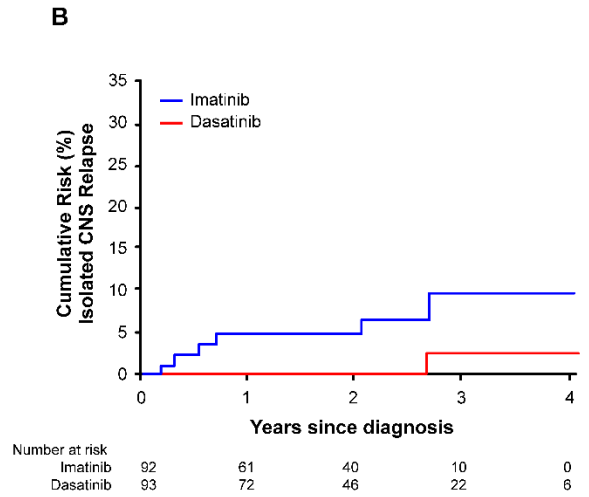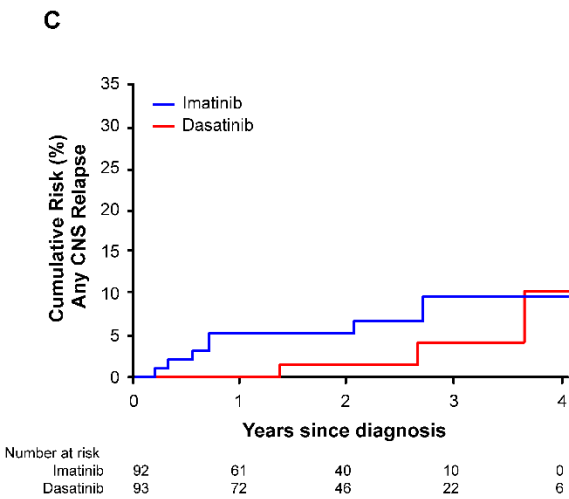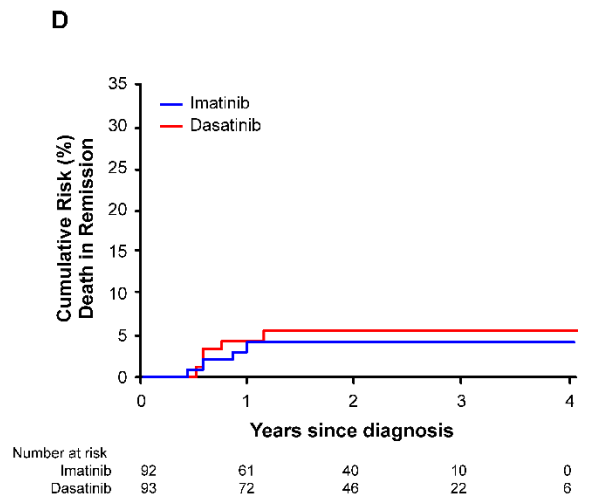



**eFigure 3. Event-Free Survival (A) and Overall Survival (B) of Patients Treated in St. Jude Total XVI Study**

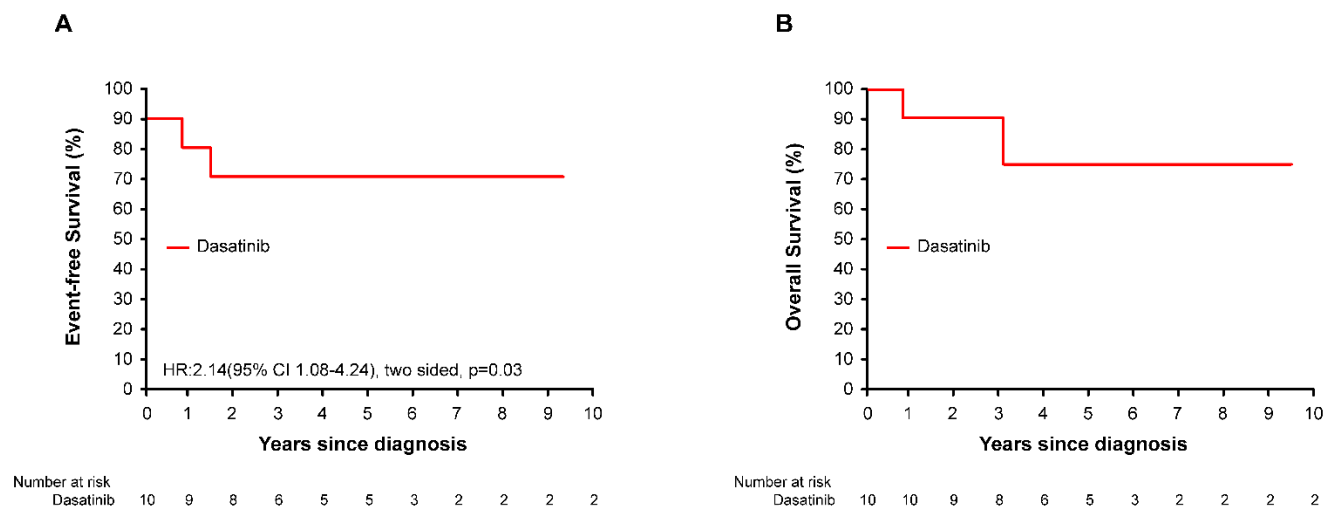

## eAppendix. Run-time Printout Log

Call:

```
survdiff(formula = data1 ~ cccg1$IGroup)
```

|                 | N  | Observed | Expected | (O-E)^2/E | (O-E)^2/V |
|-----------------|----|----------|----------|-----------|-----------|
| cccg1\$IGroup=1 | 92 | 15       | 24.3     | 3.54      | 7.77      |
| cccg1\$IGroup=2 | 97 | 30       | 20.7     | 4.15      | 7.77      |

Chisq= 7.8 on 1 degrees of freedom, p= 0.005

-----  
Call: survfit(formula = data1 ~ cccg1\$IGroup)

```

cccg1$IGroup=1
time n.risk n.event survival std.err lower 95% CI upper 95% CI
0.375 89 1 0.989 0.0112 0.967 1.000
0.479 88 1 0.978 0.0157 0.947 1.000
0.485 87 1 0.966 0.0191 0.930 1.000
0.537 86 1 0.955 0.0220 0.913 0.999
0.553 85 2 0.933 0.0266 0.882 0.986
0.679 83 1 0.921 0.0285 0.867 0.979
0.728 82 1 0.910 0.0303 0.853 0.972
1.109 68 1 0.897 0.0327 0.835 0.963
1.328 63 1 0.882 0.0351 0.816 0.954
1.892 49 1 0.864 0.0388 0.792 0.944
1.958 48 1 0.846 0.0419 0.768 0.933
2.601 29 1 0.817 0.0496 0.726 0.921
3.258 19 1 0.774 0.0629 0.660 0.908
3.584 12 1 0.710 0.0845 0.562 0.896

```

```

cccg1$IGroup=2
time n.risk n.event survival std.err lower 95% CI upper 95% CI
0.120 96 1 0.990 0.0104 0.969 1.000
0.142 94 1 0.979 0.0147 0.951 1.000
0.167 91 1 0.968 0.0180 0.934 1.000
0.205 90 1 0.958 0.0208 0.918 0.999
0.298 88 1 0.947 0.0232 0.902 0.993
0.301 86 1 0.936 0.0254 0.887 0.987
0.410 83 1 0.924 0.0275 0.872 0.980
0.515 81 1 0.913 0.0294 0.857 0.973
0.550 80 1 0.902 0.0312 0.842 0.965
0.589 79 1 0.890 0.0328 0.828 0.957
0.597 78 1 0.879 0.0343 0.814 0.949
0.621 77 1 0.867 0.0357 0.800 0.940
0.646 76 1 0.856 0.0370 0.786 0.932
0.665 74 1 0.844 0.0383 0.773 0.923
0.674 73 1 0.833 0.0395 0.759 0.914
0.827 69 1 0.821 0.0407 0.745 0.905
0.854 66 1 0.808 0.0420 0.730 0.895
0.928 64 1 0.796 0.0432 0.715 0.885
0.953 63 2 0.770 0.0453 0.686 0.865
1.350 52 1 0.756 0.0468 0.669 0.853
1.615 50 1 0.740 0.0483 0.652 0.841
1.815 44 1 0.724 0.0500 0.632 0.829
1.889 43 1 0.707 0.0516 0.613 0.816
2.012 39 1 0.689 0.0534 0.592 0.802
2.045 36 1 0.670 0.0552 0.570 0.787

```

2.081 34 1 0.650 0.0570 0.547 0.772

|       |    |   |       |        |       |       |
|-------|----|---|-------|--------|-------|-------|
| 2.560 | 21 | 1 | 0.619 | 0.0621 | 0.508 | 0.753 |
| 2.639 | 19 | 1 | 0.586 | 0.0668 | 0.469 | 0.733 |
| 3.729 | 6  | 1 | 0.489 | 0.1052 | 0.320 | 0.745 |

Call:  
coxph(formula = data1 ~ as.factor(cccg1\$IGroup))

n= 189, number of events= 45

|                           | coef   | exp(coef) | se(coef) | z     | Pr(> z )   |
|---------------------------|--------|-----------|----------|-------|------------|
| as.factor(cccg1\$IGroup)2 | 0.8594 | 2.3618    | 0.3178   | 2.705 | 0.00684 ** |

---  
Signif. codes: 0 '\*\*\*' 0.001 '\*\*' 0.01 '\*' 0.05 '.' 0.1 ' ' 1

|                           | exp(coef) | exp(-coef) | lower .95 | upper .95 |
|---------------------------|-----------|------------|-----------|-----------|
| as.factor(cccg1\$IGroup)2 | 2.362     | 0.4234     | 1.267     | 4.403     |

Concordance= 0.607 (se = 0.037 )  
Likelihood ratio test= 7.82 on 1 df, p=0.005  
Wald test = 7.31 on 1 df, p=0.007  
Score (logrank) test = 7.76 on 1 df, p=0.005

=====  
Call:  
survdifff(formula = data1 ~ cccg1\$IGroup)

|                 | N  | Observed | Expected | (O-E)^2/E | (O-E)^2/V |
|-----------------|----|----------|----------|-----------|-----------|
| cccg1\$IGroup=1 | 92 | 9        | 14.4     | 2.05      | 4.26      |
| cccg1\$IGroup=2 | 97 | 19       | 13.6     | 2.19      | 4.26      |

Chisq= 4.3 on 1 degrees of freedom, p= 0.04

-----  
Call: survfit(formula = data1 ~ cccg1\$IGroup)

| cccg1\$IGroup=1 |        |         |          |         |              |              |
|-----------------|--------|---------|----------|---------|--------------|--------------|
| time            | n.risk | n.event | survival | std.err | lower 95% CI | upper 95% CI |
| 0.476           | 92     | 1       | 0.989    | 0.0108  | 0.968        | 1.000        |
| 0.485           | 91     | 1       | 0.978    | 0.0152  | 0.949        | 1.000        |
| 0.553           | 88     | 2       | 0.956    | 0.0215  | 0.915        | 0.999        |
| 0.728           | 86     | 1       | 0.945    | 0.0240  | 0.899        | 0.993        |
| 0.871           | 80     | 1       | 0.933    | 0.0264  | 0.883        | 0.986        |
| 1.109           | 72     | 1       | 0.920    | 0.0290  | 0.865        | 0.979        |
| 1.958           | 53     | 1       | 0.903    | 0.0333  | 0.840        | 0.970        |
| 2.075           | 48     | 1       | 0.884    | 0.0375  | 0.813        | 0.961        |

| cccg1\$IGroup=2 |        |         |          |         |              |              |
|-----------------|--------|---------|----------|---------|--------------|--------------|
| time            | n.risk | n.event | survival | std.err | lower 95% CI | upper 95% CI |
| 0.120           | 97     | 1       | 0.990    | 0.0103  | 0.970        | 1.000        |
| 0.227           | 94     | 1       | 0.979    | 0.0146  | 0.951        | 1.000        |
| 0.389           | 92     | 1       | 0.969    | 0.0179  | 0.934        | 1.000        |
| 0.410           | 90     | 1       | 0.958    | 0.0207  | 0.918        | 0.999        |
| 0.463           | 89     | 1       | 0.947    | 0.0231  | 0.903        | 0.993        |
| 0.550           | 88     | 1       | 0.936    | 0.0252  | 0.888        | 0.987        |
| 0.627           | 85     | 1       | 0.925    | 0.0272  | 0.873        | 0.980        |
| 0.745           | 83     | 1       | 0.914    | 0.0291  | 0.859        | 0.973        |
| 0.827           | 79     | 1       | 0.903    | 0.0309  | 0.844        | 0.965        |

|       |    |   |       |        |       |       |
|-------|----|---|-------|--------|-------|-------|
| 0.830 | 78 | 1 | 0.891 | 0.0326 | 0.829 | 0.957 |
| 0.953 | 74 | 1 | 0.879 | 0.0343 | 0.814 | 0.949 |
| 1.010 | 72 | 1 | 0.867 | 0.0360 | 0.799 | 0.940 |
| 1.024 | 71 | 1 | 0.854 | 0.0375 | 0.784 | 0.931 |
| 1.103 | 68 | 1 | 0.842 | 0.0390 | 0.769 | 0.922 |
| 1.227 | 66 | 1 | 0.829 | 0.0404 | 0.754 | 0.912 |
| 1.629 | 57 | 1 | 0.815 | 0.0422 | 0.736 | 0.902 |
| 2.595 | 28 | 1 | 0.786 | 0.0497 | 0.694 | 0.889 |
| 2.700 | 22 | 1 | 0.750 | 0.0589 | 0.643 | 0.875 |
| 3.036 | 13 | 1 | 0.692 | 0.0776 | 0.556 | 0.862 |

Call:

```
coxph(formula = data1 ~ as.factor(cccg1$IGroup))
```

n= 189, number of events= 28

|                           | coef   | exp(coef) | se(coef) | z     | Pr(> z ) |
|---------------------------|--------|-----------|----------|-------|----------|
| as.factor(cccg1\$IGroup)2 | 0.8132 | 2.2552    | 0.4053   | 2.007 | 0.0448 * |

---

Signif. codes: 0 '\*\*\*' 0.001 '\*\*' 0.01 '\*' 0.05 '.' 0.1 ' ' 1

|                           | exp(coef) | exp(-coef) | lower .95 | upper .95 |
|---------------------------|-----------|------------|-----------|-----------|
| as.factor(cccg1\$IGroup)2 | 2.255     | 0.4434     | 1.019     | 4.991     |

Concordance= 0.589 (se = 0.047 )

Likelihood ratio test= 4.33 on 1 df, p=0.04

Wald test = 4.03 on 1 df, p=0.04

Score (logrank) test = 4.25 on 1 df, p=0.04

=====

Tests:

|   | stat     | pv         | df |
|---|----------|------------|----|
| 1 | 6.092139 | 0.01357846 | 1  |
| 2 | 3.088889 | 0.07882861 | 1  |

Estimates and Variances:

\$est

|     | 1          | 2         | 3          | 4         |
|-----|------------|-----------|------------|-----------|
| 1 1 | 0.02173913 | 0.0690390 | 0.09651195 | 0.1977281 |
| 2 1 | 0.11607106 | 0.1587490 | 0.26274427 | NA        |
| 1 2 | 0.10941076 | 0.1342453 | 0.13424533 | 0.1342453 |
| 2 2 | 0.19727191 | 0.2227214 | 0.24980219 | NA        |

\$var

|     | 1            | 2           | 3           | 4           |
|-----|--------------|-------------|-------------|-------------|
| 1 1 | 0.0002338391 | 0.000943900 | 0.001643225 | 0.006361127 |
| 2 1 | 0.0011006105 | 0.001586525 | 0.003295212 | NA          |
| 1 2 | 0.0010799721 | 0.001324830 | 0.001324830 | 0.001324830 |
| 2 2 | 0.0016679852 | 0.001883047 | 0.002493000 | NA          |

\$est

|     | 3.9       |
|-----|-----------|
| 1 1 | 0.1977281 |
| 2 1 | 0.3439865 |
| 1 2 | 0.1342453 |

2 2 0.2498022

\$var

3.9

1 1 0.006361127

2 1 0.009170958

1 2 0.001324830

2 2 0.002493000

stat pv df

1 6.092139 0.01357846 1

2 3.088889 0.07882861 1

-----  
Tests:

stat pv df

1 3.452751 0.063146602 1

2 6.778150 0.009228051 1

Estimates and Variances:

\$est

1 1 0.00000000 0.00000000 0.02747295 0.02747295

2 1 0.04123711 0.04123711 0.08417760 NA

1 2 0.13114989 0.20328432 0.20328432 0.30450047

2 2 0.27210586 0.34023333 0.42836887 NA

\$var

1 1 0.000000000 0.000000000 0.0007572123 0.0007572123

2 1 0.0004125514 0.0004125514 0.0013565229 NA

1 2 0.0012615178 0.0020596686 0.0020596686 0.0066480895

2 2 0.0021110864 0.0025991931 0.0038150089 NA

\$est

3.9

1 1 0.02747295

2 1 0.08417760

1 2 0.30450047

2 2 0.50961112

\$var

3.9

1 1 0.0007572123

2 1 0.0013565229

1 2 0.0066480895

2 2 0.0094149955

stat pv df

1 3.452751 0.063146602 1

2 6.778150 0.009228051 1

-----  
Tests:

stat pv df

1 1.662040 0.197328158 1

2 7.623387 0.005761619 1

Estimates and Variances:

\$est

|     | 1          | 2          | 3          | 4         |
|-----|------------|------------|------------|-----------|
| 1 1 | 0.00000000 | 0.01339707 | 0.04087003 | 0.1015997 |
| 2 1 | 0.05154639 | 0.05154639 | 0.09448688 | NA        |
| 1 2 | 0.13114989 | 0.18988725 | 0.18988725 | 0.2303737 |
| 2 2 | 0.26179659 | 0.32992405 | 0.41805959 | NA        |

\$var

|     | 1           | 2            | 3            | 4           |
|-----|-------------|--------------|--------------|-------------|
| 1 1 | 0.00000000  | 0.0001798581 | 0.0009267419 | 0.004511714 |
| 2 1 | 0.000510276 | 0.0005102760 | 0.0014449927 | NA          |
| 1 2 | 0.001261518 | 0.0019400008 | 0.0019400008 | 0.003392454 |
| 2 2 | 0.002060820 | 0.0025636096 | 0.0037984207 | NA          |

\$est

|     | 3.9        |
|-----|------------|
| 1 1 | 0.10159971 |
| 2 1 | 0.09448688 |
| 1 2 | 0.23037371 |
| 2 2 | 0.49930184 |

\$var

|     | 3.9         |
|-----|-------------|
| 1 1 | 0.004511714 |
| 2 1 | 0.001444993 |
| 1 2 | 0.003392454 |
| 2 2 | 0.009415917 |

| stat | pv       | df            |
|------|----------|---------------|
| 1    | 1.662040 | 0.197328158 1 |
| 2    | 7.623387 | 0.005761619 1 |

-----  
Tests:

| stat | pv         | df             |
|------|------------|----------------|
| 1    | 0.1760269  | 0.6748101099 1 |
| 2    | 13.3892197 | 0.0002530747 1 |

Estimates and Variances:

\$est

|     | 1          | 2          | 3          | 4          |
|-----|------------|------------|------------|------------|
| 1 1 | 0.04347826 | 0.05607551 | 0.05607551 | 0.05607551 |
| 2 1 | 0.04263274 | 0.04263274 | 0.04263274 | NA         |
| 1 2 | 0.08767162 | 0.14720882 | 0.17468177 | 0.27589792 |
| 2 2 | 0.27071024 | 0.33883770 | 0.46991373 | NA         |

\$var

|     | 1            | 2            | 3            | 4            |
|-----|--------------|--------------|--------------|--------------|
| 1 1 | 0.0004574444 | 0.0006043831 | 0.0006043831 | 0.0006043831 |
| 2 1 | 0.0004420096 | 0.0004420096 | 0.0004420096 | NA           |
| 1 2 | 0.0008878914 | 0.0016400244 | 0.0022905019 | 0.0068284409 |
| 2 2 | 0.0020902526 | 0.0025831148 | 0.0042369478 | NA           |

\$est

|     | 3.9        |
|-----|------------|
| 1 1 | 0.05607551 |
| 2 1 | 0.04263274 |
| 1 2 | 0.27589792 |
| 2 2 | 0.55115598 |

```

$var
      3.9
1 1 0.0006043831
2 1 0.0004420096
1 2 0.0068284409
2 2 0.0096140089

```

```

      stat      pv df
1 0.1760269 0.6748101099 1
2 13.3892197 0.0002530747 1

```

```

Call:
survdiff(formula = data1 ~ cccg1$AGroup)

```

|                 | N  | Observed | Expected | (O-E)^2/E | (O-E)^2/V |
|-----------------|----|----------|----------|-----------|-----------|
| cccg1\$AGroup=1 | 94 | 21       | 34.1     | 5.01      | 11        |
| cccg1\$AGroup=2 | 95 | 42       | 28.9     | 5.89      | 11        |

Chisq= 11 on 1 degrees of freedom, p= 9e-04

```

Call: survfit(formula = data1 ~ cccg1$AGroup)

```

| cccg1\$AGroup=1 |        |         |          |         |              |              |
|-----------------|--------|---------|----------|---------|--------------|--------------|
| time            | n.risk | n.event | survival | std.err | lower 95% CI | upper 95% CI |
| 0.205           | 94     | 1       | 0.989    | 0.0106  | 0.969        | 1.000        |
| 0.285           | 93     | 1       | 0.979    | 0.0149  | 0.950        | 1.000        |
| 0.364           | 92     | 1       | 0.968    | 0.0181  | 0.933        | 1.000        |
| 0.375           | 91     | 1       | 0.957    | 0.0208  | 0.917        | 0.999        |
| 0.479           | 90     | 1       | 0.947    | 0.0231  | 0.903        | 0.993        |
| 0.485           | 89     | 1       | 0.936    | 0.0252  | 0.888        | 0.987        |
| 0.553           | 88     | 2       | 0.915    | 0.0288  | 0.860        | 0.973        |
| 0.589           | 86     | 1       | 0.904    | 0.0303  | 0.847        | 0.966        |
| 0.679           | 85     | 1       | 0.894    | 0.0318  | 0.833        | 0.958        |
| 0.728           | 84     | 1       | 0.883    | 0.0332  | 0.820        | 0.950        |
| 0.871           | 77     | 1       | 0.872    | 0.0347  | 0.806        | 0.942        |
| 0.953           | 74     | 1       | 0.860    | 0.0361  | 0.792        | 0.934        |
| 1.040           | 71     | 1       | 0.848    | 0.0376  | 0.777        | 0.925        |
| 1.046           | 70     | 1       | 0.836    | 0.0390  | 0.763        | 0.915        |
| 1.109           | 67     | 1       | 0.823    | 0.0403  | 0.748        | 0.906        |
| 1.328           | 61     | 1       | 0.810    | 0.0419  | 0.732        | 0.896        |
| 1.958           | 48     | 1       | 0.793    | 0.0443  | 0.711        | 0.884        |
| 2.601           | 30     | 1       | 0.766    | 0.0500  | 0.674        | 0.871        |
| 3.258           | 19     | 1       | 0.726    | 0.0616  | 0.615        | 0.857        |
| 3.584           | 12     | 1       | 0.665    | 0.0809  | 0.524        | 0.844        |

| cccg1\$AGroup=2 |        |         |          |         |              |              |
|-----------------|--------|---------|----------|---------|--------------|--------------|
| time            | n.risk | n.event | survival | std.err | lower 95% CI | upper 95% CI |
| 0.0876          | 95     | 1       | 0.989    | 0.0105  | 0.969        | 1.000        |
| 0.1205          | 94     | 1       | 0.979    | 0.0147  | 0.951        | 1.000        |
| 0.1369          | 93     | 1       | 0.968    | 0.0179  | 0.934        | 1.000        |
| 0.1424          | 92     | 1       | 0.958    | 0.0206  | 0.918        | 0.999        |
| 0.1533          | 91     | 1       | 0.947    | 0.0229  | 0.904        | 0.993        |
| 0.1615          | 90     | 1       | 0.937    | 0.0250  | 0.889        | 0.987        |



|        |    |   |       |        |       |       |
|--------|----|---|-------|--------|-------|-------|
| 0.1670 | 89 | 1 | 0.926 | 0.0268 | 0.875 | 0.980 |
| 0.2053 | 88 | 1 | 0.916 | 0.0285 | 0.862 | 0.973 |
| 0.2656 | 87 | 1 | 0.905 | 0.0300 | 0.848 | 0.966 |
| 0.2984 | 86 | 2 | 0.884 | 0.0328 | 0.822 | 0.951 |
| 0.3012 | 84 | 1 | 0.874 | 0.0341 | 0.809 | 0.943 |
| 0.3094 | 83 | 1 | 0.863 | 0.0353 | 0.797 | 0.935 |
| 0.3614 | 82 | 1 | 0.853 | 0.0364 | 0.784 | 0.927 |
| 0.4100 | 81 | 1 | 0.842 | 0.0374 | 0.772 | 0.919 |
| 0.4627 | 80 | 1 | 0.832 | 0.0384 | 0.760 | 0.910 |
| 0.5147 | 79 | 1 | 0.821 | 0.0393 | 0.747 | 0.902 |
| 0.5366 | 78 | 1 | 0.811 | 0.0402 | 0.735 | 0.893 |
| 0.5503 | 77 | 1 | 0.800 | 0.0410 | 0.723 | 0.885 |
| 0.5969 | 76 | 1 | 0.789 | 0.0418 | 0.712 | 0.876 |
| 0.6215 | 75 | 1 | 0.779 | 0.0426 | 0.700 | 0.867 |
| 0.6461 | 74 | 1 | 0.768 | 0.0433 | 0.688 | 0.858 |
| 0.6626 | 73 | 1 | 0.758 | 0.0439 | 0.676 | 0.849 |
| 0.6653 | 72 | 1 | 0.747 | 0.0446 | 0.665 | 0.840 |
| 0.6735 | 71 | 1 | 0.737 | 0.0452 | 0.653 | 0.831 |
| 0.8268 | 68 | 1 | 0.726 | 0.0458 | 0.642 | 0.822 |
| 0.8542 | 65 | 1 | 0.715 | 0.0464 | 0.629 | 0.812 |
| 0.9281 | 63 | 1 | 0.703 | 0.0471 | 0.617 | 0.802 |
| 0.9528 | 62 | 1 | 0.692 | 0.0477 | 0.605 | 0.792 |
| 1.3142 | 57 | 1 | 0.680 | 0.0483 | 0.592 | 0.782 |
| 1.3498 | 55 | 1 | 0.668 | 0.0490 | 0.578 | 0.771 |
| 1.6153 | 52 | 1 | 0.655 | 0.0497 | 0.564 | 0.760 |
| 1.8152 | 45 | 1 | 0.640 | 0.0507 | 0.548 | 0.748 |
| 1.8891 | 44 | 1 | 0.626 | 0.0516 | 0.532 | 0.735 |
| 1.8919 | 43 | 1 | 0.611 | 0.0524 | 0.517 | 0.723 |
| 2.0123 | 39 | 1 | 0.595 | 0.0534 | 0.500 | 0.710 |
| 2.0452 | 36 | 1 | 0.579 | 0.0544 | 0.482 | 0.696 |
| 2.0808 | 33 | 1 | 0.561 | 0.0555 | 0.463 | 0.681 |
| 2.5599 | 20 | 1 | 0.533 | 0.0594 | 0.429 | 0.663 |
| 2.6201 | 19 | 1 | 0.505 | 0.0625 | 0.396 | 0.644 |
| 2.6393 | 18 | 1 | 0.477 | 0.0651 | 0.365 | 0.623 |
| 3.7290 | 6  | 1 | 0.398 | 0.0906 | 0.254 | 0.622 |

Call:

coxph(formula = data1 ~ as.factor(cccg1\$AGroup))

n= 189, number of events= 63

|                           | coef   | exp(coef) | se(coef) | z     | Pr(> z )   |
|---------------------------|--------|-----------|----------|-------|------------|
| as.factor(cccg1\$AGroup)2 | 0.8622 | 2.3684    | 0.2683   | 3.214 | 0.00131 ** |

---

Signif. codes: 0 '\*\*\*' 0.001 '\*\*' 0.01 '\*' 0.05 '.' 0.1 ' ' 1

|                           | exp(coef) | exp(-coef) | lower .95 | upper .95 |
|---------------------------|-----------|------------|-----------|-----------|
| as.factor(cccg1\$AGroup)2 | 2.368     | 0.4222     | 1.4       | 4.007     |

Concordance= 0.605 (se = 0.031 )

Likelihood ratio test= 11.05 on 1 df, p=9e-04

Wald test = 10.33 on 1 df, p=0.001

Score (logrank) test = 10.97 on 1 df, p=9e-04

=====  
Call:

survdiff(formula = data1 ~ cccg1\$AGroup)

|                 | N  | Observed | Expected | (O-E)^2/E | (O-E)^2/V |
|-----------------|----|----------|----------|-----------|-----------|
| cccg1\$AGroup=1 | 94 | 11       | 14.7     | 0.913     | 1.92      |
| cccg1\$AGroup=2 | 95 | 17       | 13.3     | 1.003     | 1.92      |

Chisq= 1.9 on 1 degrees of freedom, p= 0.2

-----  
Call: survfit(formula = data1 ~ cccg1\$AGroup)

| cccg1\$AGroup=1 |        |         |          |         |              |              |
|-----------------|--------|---------|----------|---------|--------------|--------------|
| time            | n.risk | n.event | survival | std.err | lower 95% CI | upper 95% CI |
| 0.476           | 94     | 1       | 0.989    | 0.0106  | 0.969        | 1.000        |
| 0.485           | 93     | 1       | 0.979    | 0.0149  | 0.950        | 1.000        |
| 0.553           | 90     | 2       | 0.957    | 0.0210  | 0.917        | 0.999        |
| 0.728           | 88     | 1       | 0.946    | 0.0235  | 0.901        | 0.993        |
| 0.871           | 81     | 1       | 0.934    | 0.0259  | 0.885        | 0.987        |
| 1.109           | 73     | 1       | 0.922    | 0.0285  | 0.867        | 0.979        |
| 1.227           | 68     | 1       | 0.908    | 0.0312  | 0.849        | 0.971        |
| 1.629           | 58     | 1       | 0.892    | 0.0343  | 0.828        | 0.962        |
| 1.958           | 52     | 1       | 0.875    | 0.0377  | 0.804        | 0.952        |
| 2.075           | 48     | 1       | 0.857    | 0.0411  | 0.780        | 0.942        |

| cccg1\$AGroup=2 |        |         |          |         |              |              |
|-----------------|--------|---------|----------|---------|--------------|--------------|
| time            | n.risk | n.event | survival | std.err | lower 95% CI | upper 95% CI |
| 0.120           | 95     | 1       | 0.989    | 0.0105  | 0.969        | 1.000        |
| 0.227           | 92     | 1       | 0.979    | 0.0149  | 0.950        | 1.000        |
| 0.389           | 90     | 1       | 0.968    | 0.0183  | 0.933        | 1.000        |
| 0.410           | 88     | 1       | 0.957    | 0.0211  | 0.916        | 0.999        |
| 0.463           | 87     | 1       | 0.946    | 0.0236  | 0.901        | 0.993        |
| 0.550           | 86     | 1       | 0.935    | 0.0257  | 0.886        | 0.987        |
| 0.627           | 83     | 1       | 0.924    | 0.0278  | 0.871        | 0.980        |
| 0.745           | 81     | 1       | 0.912    | 0.0297  | 0.856        | 0.972        |
| 0.827           | 78     | 1       | 0.900    | 0.0315  | 0.841        | 0.964        |
| 0.830           | 77     | 1       | 0.889    | 0.0332  | 0.826        | 0.956        |
| 0.953           | 73     | 1       | 0.877    | 0.0349  | 0.811        | 0.948        |
| 1.010           | 72     | 1       | 0.864    | 0.0365  | 0.796        | 0.939        |
| 1.024           | 71     | 1       | 0.852    | 0.0380  | 0.781        | 0.930        |
| 1.103           | 67     | 1       | 0.840    | 0.0395  | 0.766        | 0.921        |
| 2.595           | 27     | 1       | 0.808    | 0.0487  | 0.718        | 0.910        |
| 2.700           | 21     | 1       | 0.770    | 0.0597  | 0.661        | 0.896        |
| 3.036           | 13     | 1       | 0.711    | 0.0792  | 0.571        | 0.884        |

Call:

coxph(formula = data1 ~ as.factor(cccg1\$AGroup))

n= 189, number of events= 28

|                           | coef   | exp(coef) | se(coef) | z     | Pr(> z ) |
|---------------------------|--------|-----------|----------|-------|----------|
| as.factor(cccg1\$AGroup)2 | 0.5307 | 1.7001    | 0.3876   | 1.369 | 0.171    |

|                           | exp(coef) | exp(-coef) | lower .95 | upper .95 |
|---------------------------|-----------|------------|-----------|-----------|
| as.factor(cccg1\$AGroup)2 | 1.7       | 0.5882     | 0.7954    | 3.634     |

Concordance= 0.563 (se = 0.048 )

Likelihood ratio test= 1.93 on 1 df, p=0.2

Wald test = 1.87 on 1 df, p=0.2  
Score (logrank) test = 1.92 on 1 df, p=0.2

=====

Tests:

|   | stat     | pv         | df |
|---|----------|------------|----|
| 1 | 4.315720 | 0.03776180 | 1  |
| 2 | 5.001809 | 0.02532084 | 1  |

Estimates and Variances:

\$est

|     | 1          | 2          | 3         | 4         |
|-----|------------|------------|-----------|-----------|
| 1 1 | 0.04369208 | 0.07448402 | 0.1012844 | 0.2035491 |
| 2 1 | 0.09620015 | 0.15269252 | 0.2585863 | NA        |
| 1 2 | 0.09657364 | 0.12150410 | 0.1215041 | 0.1215041 |
| 2 2 | 0.21165621 | 0.23616274 | 0.2642322 | NA        |

\$var

|     | 1            | 2            | 3           | 4           |
|-----|--------------|--------------|-------------|-------------|
| 1 1 | 0.0004632928 | 0.0009076806 | 0.001574214 | 0.006410207 |
| 2 1 | 0.0009434105 | 0.0015924069 | 0.003391088 | NA          |
| 1 2 | 0.0009484131 | 0.0012035218 | 0.001203522 | 0.001203522 |
| 2 2 | 0.0017911360 | 0.0019774931 | 0.002629488 | NA          |

\$est

|     | 3.9       |
|-----|-----------|
| 1 1 | 0.2035491 |
| 2 1 | 0.3381165 |
| 1 2 | 0.1215041 |
| 2 2 | 0.2642322 |

\$var

|     | 3.9         |
|-----|-------------|
| 1 1 | 0.006410207 |
| 2 1 | 0.008979540 |
| 1 2 | 0.001203522 |
| 2 2 | 0.002629488 |

|   | stat     | pv         | df |
|---|----------|------------|----|
| 1 | 4.315720 | 0.03776180 | 1  |
| 2 | 5.001809 | 0.02532084 | 1  |

Tests:

|   | stat     | pv          | df |
|---|----------|-------------|----|
| 1 | 3.647831 | 0.056142290 | 1  |
| 2 | 7.283900 | 0.006957533 | 1  |

Estimates and Variances:

\$est

|     | 1          | 2          | 3          | 4         |
|-----|------------|------------|------------|-----------|
| 1 1 | 0.00000000 | 0.00000000 | 0.02680040 | 0.0268004 |
| 2 1 | 0.04210526 | 0.04210526 | 0.08584514 | NA        |
| 1 2 | 0.14026571 | 0.19598812 | 0.19598812 | 0.2982528 |
| 2 2 | 0.26575110 | 0.34675000 | 0.43697338 | NA        |

\$var

|     | 1            | 2            | 3           | 4           |
|-----|--------------|--------------|-------------|-------------|
| 1 1 | 0.0000000000 | 0.0000000000 | 0.000720385 | 0.000720385 |
| 2 1 | 0.0004298454 | 0.0004298454 | 0.001421635 | NA          |
| 1 2 | 0.0013206589 | 0.0019113941 | 0.001911394 | 0.006639451 |
| 2 2 | 0.0021085923 | 0.0026716960 | 0.003947729 | NA          |

\$est

|     | 3.9        |
|-----|------------|
| 1 1 | 0.02680040 |
| 2 1 | 0.08584514 |
| 1 2 | 0.29825279 |
| 2 2 | 0.51650363 |

\$var

|     | 3.9         |
|-----|-------------|
| 1 1 | 0.000720385 |
| 2 1 | 0.001421635 |
| 1 2 | 0.006639451 |
| 2 2 | 0.009242098 |

|   | stat     | pv          | df |
|---|----------|-------------|----|
| 1 | 3.647831 | 0.056142290 | 1  |
| 2 | 7.283900 | 0.006957533 | 1  |

-----  
Tests:

|   | stat     | pv         | df |
|---|----------|------------|----|
| 1 | 1.761722 | 0.18440986 | 1  |
| 2 | 8.182802 | 0.00422894 | 1  |

Estimates and Variances:

\$est

|     | 1           | 2          | 3          | 4         |
|-----|-------------|------------|------------|-----------|
| 1 1 | 0.000000000 | 0.01368531 | 0.04048570 | 0.1018445 |
| 2 1 | 0.05263158  | 0.05263158 | 0.09637146 | NA        |
| 1 2 | 0.14026571  | 0.18230281 | 0.18230281 | 0.2232087 |
| 2 2 | 0.25522479  | 0.33622368 | 0.42644707 | NA        |

\$var

|     | 1            | 2            | 3           | 4           |
|-----|--------------|--------------|-------------|-------------|
| 1 1 | 0.0000000000 | 0.0001877046 | 0.000897497 | 0.004561692 |
| 2 1 | 0.0005315467 | 0.0005315467 | 0.001513504 | NA          |
| 1 2 | 0.0013206589 | 0.0017813208 | 0.001781321 | 0.003283223 |
| 2 2 | 0.0020547095 | 0.0026360206 | 0.003932335 | NA          |

\$est

|     | 3.9        |
|-----|------------|
| 1 1 | 0.10184451 |
| 2 1 | 0.09637146 |
| 1 2 | 0.22320868 |
| 2 2 | 0.50597731 |

\$var

|     | 3.9         |
|-----|-------------|
| 1 1 | 0.004561692 |
| 2 1 | 0.001513504 |
| 1 2 | 0.003283223 |
| 2 2 | 0.009244581 |

```

stat      pv df
1 1.761722 0.18440986 1
2 8.182802 0.00422894 1

```

-----

Tests:

```

stat      pv df
1 0.1384293 0.7098475188 1
2 14.0968484 0.0001736345 1

```

Estimates and Variances:

```

$est
      1      2      3      4
1 1 0.04255319 0.05520173 0.05520173 0.05520173
2 1 0.04323516 0.04323516 0.04323516      NA
1 2 0.09771252 0.14078639 0.16758678 0.26985145
2 2 0.26462121 0.34562010 0.47958336      NA

```

```

$var
      1      2      3      4
1 1 0.0004384597 0.0005871797 0.0005871797 0.0005871797
2 1 0.0004542231 0.0004542231 0.0004542231      NA
1 2 0.0009716645 0.0014946012 0.0021210257 0.0068039726
2 2 0.0020908775 0.0026590722 0.0043854500      NA

```

```

$est
      3.9
1 1 0.05520173
2 1 0.04323516
1 2 0.26985145
2 2 0.55911361

```

```

$var
      3.9
1 1 0.0005871797
2 1 0.0004542231
1 2 0.0068039726
2 2 0.0094457358

```

```

stat      pv df
1 0.1384293 0.7098475188 1
2 14.0968484 0.0001736345 1

```

=====

Table 1:

Call:

```

coxph(formula = data9 ~ as.factor(cccg2$IGROUP) + as.factor(cccg2$AGE) +
as.factor(cccg2$"WBC(100)") + as.factor(cccg2$CNSL) + as.factor(cccg2$"D19MRD(5)") +
as.factor(cccg2$"D46MRD(%)") + as.factor(cccg2$BT) + as.factor(cccg2$FRisk))

```

n= 183, number of events= 44

```

              coef exp(coef) se(coef)    z Pr(>|z|)
as.factor(cccg2$IGROUP)2  1.0235  2.7830  0.3605  2.840 0.004518 **
as.factor(cccg2$AGE)3    0.7041  2.0220  0.3460  2.035 0.041851 *
as.factor(cccg2$"WBC(100)")2  1.4227  4.1484  0.3677  3.869 0.000109 ***

```

```

as.factor(cccg2$CNSL)2 -1.2166 0.2962 0.7260 -1.676 0.093790 .
as.factor(cccg2$CNSL)3 0.1776 1.1944 0.6429 0.276 0.782340
as.factor(cccg2$"D19MRD(5)")4 -0.2889 0.7491 0.5141 -0.562 0.574131
as.factor(cccg2$"D46MRD(%)"2 0.7267 2.0683 0.4606 1.578 0.114584
as.factor(cccg2$BT)2 3.0307 20.7113 0.7856 3.858 0.000114 ***
as.factor(cccg2$FRisk)2 1.1438 3.1388 0.6772 1.689 0.091216 .

```

---

Signif. codes: 0 '\*\*\*' 0.001 '\*\*' 0.01 '\*' 0.05 '.' 0.1 ' ' 1

```

exp(coef) exp(-coef) lower .95 upper .95
as.factor(cccg2$IGROUP)2 2.7830 0.35932 1.37306 5.641
as.factor(cccg2$AGE)3 2.0220 0.49456 1.02630 3.984
as.factor(cccg2$"WBC(100)"2 4.1484 0.24106 2.01769 8.529
as.factor(cccg2$CNSL)2 0.2962 3.37572 0.07139 1.229
as.factor(cccg2$CNSL)3 1.1944 0.83726 0.33876 4.211
as.factor(cccg2$"D19MRD(5)")4 0.7491 1.33499 0.27347 2.052
as.factor(cccg2$"D46MRD(%)"2 2.0683 0.48349 0.83866 5.101
as.factor(cccg2$BT)2 20.7113 0.04828 4.44093 96.592
as.factor(cccg2$FRisk)2 3.1388 0.31860 0.83236 11.836

```

Concordance= 0.781 (se = 0.039 )  
Likelihood ratio test= 50.25 on 9 df, p=1e-07  
Wald test = 47.53 on 9 df, p=3e-07  
Score (logrank) test = 62.81 on 9 df, p=4e-10

=====

eTable 5, Imatinib

Call:

```
coxph(formula = data ~ as.factor(cccg1$AGE))
```

n= 96, number of events= 30  
(1 observation deleted due to missingness)

```

coef exp(coef) se(coef) z Pr(>|z|)
as.factor(cccg1$AGE)3 0.8884 2.4312 0.3784 2.348 0.0189 *

```

---

Signif. codes: 0 '\*\*\*' 0.001 '\*\*' 0.01 '\*' 0.05 '.' 0.1 ' ' 1

```

exp(coef) exp(-coef) lower .95 upper .95
as.factor(cccg1$AGE)3 2.431 0.4113 1.158 5.104

```

Concordance= 0.599 (se = 0.047 )  
Likelihood ratio test= 5.32 on 1 df, p=0.02  
Wald test = 5.51 on 1 df, p=0.02  
Score (logrank) test = 5.86 on 1 df, p=0.02

Call:

```
coxph(formula = data ~ as.factor(cccg1$SEX))
```

n= 97, number of events= 30

```

coef exp(coef) se(coef) z Pr(>|z|)
as.factor(cccg1$SEX)2 -0.4545 0.6348 0.4041 -1.125 0.261

```

```
exp(coef) exp(-coef) lower .95 upper .95
as.factor(cccg1I$SEX)2 0.6348 1.575 0.2875 1.402
```

Concordance= 0.542 (se = 0.045 )  
Likelihood ratio test= 1.19 on 1 df, p=0.3  
Wald test = 1.26 on 1 df, p=0.3  
Score (logrank) test = 1.29 on 1 df, p=0.3

Call:  
coxph(formula = data ~ as.factor(cccg1I\$WBC(100)))

n= 97, number of events= 30

```
coef exp(coef) se(coef) z Pr(>|z|)
as.factor(cccg1I$WBC(100))2 1.235 3.438 0.402 3.072 0.00213 **
```

---  
Signif. codes: 0 '\*\*\*' 0.001 '\*\*' 0.01 '\*' 0.05 '.' 0.1 ' ' 1

```
exp(coef) exp(-coef) lower .95 upper .95
as.factor(cccg1I$WBC(100))2 3.438 0.2909 1.564 7.56
```

Concordance= 0.658 (se = 0.046 )  
Likelihood ratio test= 10.51 on 1 df, p=0.001  
Wald test = 9.44 on 1 df, p=0.002  
Score (logrank) test = 10.64 on 1 df, p=0.001

Call:  
coxph(formula = data ~ as.factor(cccg1I\$CNSL))

n= 97, number of events= 30

```
coef exp(coef) se(coef) z Pr(>|z|)
as.factor(cccg1I$CNSL)2 0.3978 1.4885 0.6127 0.649 0.516
as.factor(cccg1I$CNSL)3 0.5638 1.7573 1.0260 0.549 0.583
```

```
exp(coef) exp(-coef) lower .95 upper .95
as.factor(cccg1I$CNSL)2 1.489 0.6718 0.4480 4.946
as.factor(cccg1I$CNSL)3 1.757 0.5690 0.2352 13.129
```

Concordance= 0.526 (se = 0.032 )  
Likelihood ratio test= 0.61 on 2 df, p=0.7  
Wald test = 0.68 on 2 df, p=0.7  
Score (logrank) test = 0.69 on 2 df, p=0.7

Call:  
coxph(formula = data ~ as.factor(cccg1I\$BT))

n= 97, number of events= 30

```
coef exp(coef) se(coef) z Pr(>|z|)
as.factor(cccg1I$BT)2 2.4236 11.2859 0.7617 3.182 0.00146 **
```

---  
Signif. codes: 0 '\*\*\*' 0.001 '\*\*' 0.01 '\*' 0.05 '.' 0.1 ' ' 1

```
exp(coef) exp(-coef) lower .95 upper .95
as.factor(cccg1I$BT)2 11.29 0.08861 2.536 50.22
```

Concordance= 0.54 (se = 0.027 )  
Likelihood ratio test= 5.8 on 1 df, p=0.02  
Wald test = 10.12 on 1 df, p=0.001  
Score (logrank) test = 16.14 on 1 df, p=6e-05

Call:  
coxph(formula = data ~ as.factor(cccg1I\$P190/210"))

n= 79, number of events= 24  
(18 observations deleted due to missingness)

|                                 | coef    | exp(coef) | se(coef) | z      | Pr(> z ) |
|---------------------------------|---------|-----------|----------|--------|----------|
| as.factor(cccg1I\$P190/210)P210 | -0.3376 | 0.7135    | 0.6191   | -0.545 | 0.586    |

|                                 | exp(coef) | exp(-coef) | lower .95 | upper .95 |
|---------------------------------|-----------|------------|-----------|-----------|
| as.factor(cccg1I\$P190/210)P210 | 0.7135    | 1.402      | 0.2121    | 2.401     |

Concordance= 0.516 (se = 0.039 )  
Likelihood ratio test= 0.32 on 1 df, p=0.6  
Wald test = 0.3 on 1 df, p=0.6  
Score (logrank) test = 0.3 on 1 df, p=0.6

Call:  
coxph(formula = data ~ as.factor(cccg1I\$FRisk))

n= 97, number of events= 30

|                           | coef   | exp(coef) | se(coef) | z    | Pr(> z ) |
|---------------------------|--------|-----------|----------|------|----------|
| as.factor(cccg1I\$FRisk)2 | 1.1210 | 3.0680    | 0.6195   | 1.81 | 0.0704 . |

---  
Signif. codes: 0 '\*\*\*' 0.001 '\*\*' 0.01 '\*' 0.05 '.' 0.1 ' ' 1

|                           | exp(coef) | exp(-coef) | lower .95 | upper .95 |
|---------------------------|-----------|------------|-----------|-----------|
| as.factor(cccg1I\$FRisk)2 | 3.068     | 0.3259     | 0.9111    | 10.33     |

Concordance= 0.545 (se = 0.032 )  
Likelihood ratio test= 2.48 on 1 df, p=0.1  
Wald test = 3.27 on 1 df, p=0.07  
Score (logrank) test = 3.61 on 1 df, p=0.06

Call:  
coxph(formula = data ~ as.factor(cccg1I\$D19MRD(5)))

n= 96, number of events= 30  
(1 observation deleted due to missingness)

|                               | coef   | exp(coef) | se(coef) | z     | Pr(> z ) |
|-------------------------------|--------|-----------|----------|-------|----------|
| as.factor(cccg1I\$D19MRD(5))4 | 0.7916 | 2.2070    | 0.3996   | 1.981 | 0.0476 * |

---  
Signif. codes: 0 '\*\*\*' 0.001 '\*\*' 0.01 '\*' 0.05 '.' 0.1 ' ' 1

|                               | exp(coef) | exp(-coef) | lower .95 | upper .95 |
|-------------------------------|-----------|------------|-----------|-----------|
| as.factor(cccg1I\$D19MRD(5))4 | 2.207     | 0.4531     | 1.008     | 4.83      |

Concordance= 0.562 (se = 0.041 )



Likelihood ratio test= 3.48 on 1 df, p=0.06  
Wald test = 3.92 on 1 df, p=0.05  
Score (logrank) test = 4.13 on 1 df, p=0.04

Call:  
coxph(formula = data ~ as.factor(cccg1I\$D46MRD("%")))

n= 93, number of events= 29  
(4 observations deleted due to missingness)

|                                 | coef   | exp(coef) | se(coef) | z     | Pr(> z )   |
|---------------------------------|--------|-----------|----------|-------|------------|
| as.factor(cccg1I\$D46MRD("%"))2 | 1.0715 | 2.9196    | 0.3935   | 2.723 | 0.00648 ** |

---  
Signif. codes: 0 '\*\*\*' 0.001 '\*\*' 0.01 '\*' 0.05 '.' 0.1 ' ' 1

|                                 | exp(coef) | exp(-coef) | lower .95 | upper .95 |
|---------------------------------|-----------|------------|-----------|-----------|
| as.factor(cccg1I\$D46MRD("%"))2 | 2.92      | 0.3425     | 1.35      | 6.314     |

Concordance= 0.604 (se = 0.045 )  
Likelihood ratio test= 6.45 on 1 df, p=0.01  
Wald test = 7.41 on 1 df, p=0.006  
Score (logrank) test = 8.13 on 1 df, p=0.004

-----  
eTable 5, Dasatinib

Call:  
coxph(formula = data ~ as.factor(cccg1D\$AGE))

n= 92, number of events= 15

|                         | coef   | exp(coef) | se(coef) | z     | Pr(> z ) |
|-------------------------|--------|-----------|----------|-------|----------|
| as.factor(cccg1D\$AGE)3 | 0.2626 | 1.3003    | 0.5562   | 0.472 | 0.637    |

|                         | exp(coef) | exp(-coef) | lower .95 | upper .95 |
|-------------------------|-----------|------------|-----------|-----------|
| as.factor(cccg1D\$AGE)3 | 1.3       | 0.769      | 0.4371    | 3.868     |

Concordance= 0.536 (se = 0.068 )  
Likelihood ratio test= 0.22 on 1 df, p=0.6  
Wald test = 0.22 on 1 df, p=0.6  
Score (logrank) test = 0.22 on 1 df, p=0.6

Call:  
coxph(formula = data ~ as.factor(cccg1D\$SEX))

n= 92, number of events= 15

|                         | coef   | exp(coef) | se(coef) | z     | Pr(> z ) |
|-------------------------|--------|-----------|----------|-------|----------|
| as.factor(cccg1D\$SEX)2 | 0.1434 | 1.1541    | 0.5858   | 0.245 | 0.807    |

|                         | exp(coef) | exp(-coef) | lower .95 | upper .95 |
|-------------------------|-----------|------------|-----------|-----------|
| as.factor(cccg1D\$SEX)2 | 1.154     | 0.8664     | 0.3661    | 3.638     |

Concordance= 0.505 (se = 0.063 )  
Likelihood ratio test= 0.06 on 1 df, p=0.8  
Wald test = 0.06 on 1 df, p=0.8  
Score (logrank) test = 0.06 on 1 df, p=0.8

Call:  
coxph(formula = data ~ as.factor(cccg1D\$"WBC(100)"))

n= 92, number of events= 15

|                                | coef   | exp(coef) | se(coef) | z     | Pr(> z ) |
|--------------------------------|--------|-----------|----------|-------|----------|
| as.factor(cccg1D\$"WBC(100)")2 | 1.1633 | 3.2004    | 0.5482   | 2.122 | 0.0338 * |

---  
Signif. codes: 0 '\*\*\*' 0.001 '\*\*' 0.01 '\*' 0.05 '.' 0.1 ' ' 1

|                                | exp(coef) | exp(-coef) | lower .95 | upper .95 |
|--------------------------------|-----------|------------|-----------|-----------|
| as.factor(cccg1D\$"WBC(100)")2 | 3.2       | 0.3125     | 1.093     | 9.371     |

Concordance= 0.661 (se = 0.066 )  
Likelihood ratio test= 4.86 on 1 df, p=0.03  
Wald test = 4.5 on 1 df, p=0.03  
Score (logrank) test = 5.03 on 1 df, p=0.02

Call:  
coxph(formula = data ~ as.factor(cccg1D\$CNSL))

n= 92, number of events= 15

|                          | coef       | exp(coef) | se(coef)  | z      | Pr(> z ) |
|--------------------------|------------|-----------|-----------|--------|----------|
| as.factor(cccg1D\$CNSL)2 | -1.763e+01 | 2.199e-08 | 6.010e+03 | -0.003 | 0.9977   |
| as.factor(cccg1D\$CNSL)3 | 1.630e+00  | 5.103e+00 | 7.677e-01 | 2.123  | 0.0338 * |

---  
Signif. codes: 0 '\*\*\*' 0.001 '\*\*' 0.01 '\*' 0.05 '.' 0.1 ' ' 1

|                          | exp(coef) | exp(-coef) | lower .95 | upper .95 |
|--------------------------|-----------|------------|-----------|-----------|
| as.factor(cccg1D\$CNSL)2 | 2.199e-08 | 4.547e+07  | 0.000     | Inf       |
| as.factor(cccg1D\$CNSL)3 | 5.103e+00 | 1.960e-01  | 1.133     | 22.98     |

Concordance= 0.597 (se = 0.047 )  
Likelihood ratio test= 5.75 on 2 df, p=0.06  
Wald test = 4.51 on 2 df, p=0.1  
Score (logrank) test = 7.47 on 2 df, p=0.02

Call:  
coxph(formula = data ~ as.factor(cccg1D\$BT))

n= 92, number of events= 15

|                        | coef  | exp(coef) | se(coef) | z     | Pr(> z ) |
|------------------------|-------|-----------|----------|-------|----------|
| as.factor(cccg1D\$BT)2 | 1.811 | 6.115     | 1.047    | 1.729 | 0.0839 . |

---  
Signif. codes: 0 '\*\*\*' 0.001 '\*\*' 0.01 '\*' 0.05 '.' 0.1 ' ' 1

|                        | exp(coef) | exp(-coef) | lower .95 | upper .95 |
|------------------------|-----------|------------|-----------|-----------|
| as.factor(cccg1D\$BT)2 | 6.115     | 0.1635     | 0.7849    | 47.64     |

Concordance= 0.54 (se = 0.044 )  
Likelihood ratio test= 1.88 on 1 df, p=0.2  
Wald test = 2.99 on 1 df, p=0.08  
Score (logrank) test = 3.9 on 1 df, p=0.05

Call:  
coxph(formula = data ~ as.factor(cccg1D\$"P190/210"))

n= 72, number of events= 10  
(20 observations deleted due to missingness)

|                                   | coef    | exp(coef) | se(coef) | z      | Pr(> z ) |
|-----------------------------------|---------|-----------|----------|--------|----------|
| as.factor(cccg1D\$"P190/210")P210 | -0.5099 | 0.6006    | 1.0669   | -0.478 | 0.633    |

  

|                                   | exp(coef) | exp(-coef) | lower .95 | upper .95 |
|-----------------------------------|-----------|------------|-----------|-----------|
| as.factor(cccg1D\$"P190/210")P210 | 0.6006    | 1.665      | 0.07421   | 4.86      |

Concordance= 0.492 (se = 0.07 )  
Likelihood ratio test= 0.26 on 1 df, p=0.6  
Wald test = 0.23 on 1 df, p=0.6  
Score (logrank) test = 0.23 on 1 df, p=0.6

Call:  
coxph(formula = data ~ as.factor(cccg1D\$FRisk))

n= 92, number of events= 15

|                           | coef  | exp(coef) | se(coef) | z     | Pr(> z )   |
|---------------------------|-------|-----------|----------|-------|------------|
| as.factor(cccg1D\$FRisk)2 | 4.472 | 87.499    | 1.414    | 3.162 | 0.00157 ** |

---  
Signif. codes: 0 '\*\*\*' 0.001 '\*\*' 0.01 '\*' 0.05 '.' 0.1 ' ' 1

|                           | exp(coef) | exp(-coef) | lower .95 | upper .95 |
|---------------------------|-----------|------------|-----------|-----------|
| as.factor(cccg1D\$FRisk)2 | 87.5      | 0.01143    | 5.473     | 1399      |

Concordance= 0.545 (se = 0.042 )  
Likelihood ratio test= 6.22 on 1 df, p=0.01  
Wald test = 10 on 1 df, p=0.002  
Score (logrank) test = 42.75 on 1 df, p=6e-11

Call:  
coxph(formula = data ~ as.factor(cccg1D\$"D19MRD(5)"))

n= 92, number of events= 15

|                                 | coef   | exp(coef) | se(coef) | z     | Pr(> z ) |
|---------------------------------|--------|-----------|----------|-------|----------|
| as.factor(cccg1D\$"D19MRD(5)")4 | 1.3461 | 3.8423    | 0.5847   | 2.302 | 0.0213 * |

---  
Signif. codes: 0 '\*\*\*' 0.001 '\*\*' 0.01 '\*' 0.05 '.' 0.1 ' ' 1

|                                 | exp(coef) | exp(-coef) | lower .95 | upper .95 |
|---------------------------------|-----------|------------|-----------|-----------|
| as.factor(cccg1D\$"D19MRD(5)")4 | 3.842     | 0.2603     | 1.222     | 12.09     |

Concordance= 0.581 (se = 0.059 )  
Likelihood ratio test= 4.17 on 1 df, p=0.04  
Wald test = 5.3 on 1 df, p=0.02  
Score (logrank) test = 6.15 on 1 df, p=0.01

Call:  
coxph(formula = data ~ as.factor(cccg1D\$"D46MRD(%)))

n= 91, number of events= 15  
(1 observation deleted due to missingness)

```
          coef exp(coef) se(coef)  z Pr(>|z|)
as.factor(cccg1D$"D46MRD(%)")2 1.4384  4.2140  0.5196 2.768 0.00564 **
---
Signif. codes:  0 '***' 0.001 '**' 0.01 '*' 0.05 '.' 0.1 ' ' 1
```

```
          exp(coef) exp(-coef) lower .95 upper .95
as.factor(cccg1D$"D46MRD(%)")2  4.214  0.2373  1.522  11.67
```

Concordance= 0.695 (se = 0.067 )  
Likelihood ratio test= 6.9 on 1 df, p=0.009  
Wald test = 7.66 on 1 df, p=0.006  
Score (logrank) test = 9.06 on 1 df, p=0.003

=====

eTable 3:

Fisher's Exact Test for Count Data

data: X  
p-value = 0.8152  
alternative hypothesis: two.sided

Fisher's Exact Test for Count Data

data: X  
p-value = 1  
alternative hypothesis: true odds ratio is not equal to 1  
95 percent confidence interval:  
0.5146342 2.0243752  
sample estimates:  
odds ratio  
1.021216

Fisher's Exact Test for Count Data

data: X  
p-value = 0.1246  
alternative hypothesis: two.sided

Fisher's Exact Test for Count Data

data: X  
p-value = 1  
alternative hypothesis: two.sided

Fisher's Exact Test for Count Data

data: X  
p-value = 1  
alternative hypothesis: true odds ratio is not equal to 1  
95 percent confidence interval:  
0.07504541 14.83866993  
sample estimates:  
odds ratio  
1.055278

Fisher's Exact Test for Count Data

data: X  
p-value = 0.1063  
alternative hypothesis: two.sided

Fisher's Exact Test for Count Data

data: X  
p-value = 0.6567  
alternative hypothesis: true odds ratio is not equal to 1  
95 percent confidence interval:  
0.2758955 1.9721007  
sample estimates:  
odds ratio  
0.7502786

Fisher's Exact Test for Count Data

data: X  
p-value = 1  
alternative hypothesis: true odds ratio is not equal to 1  
95 percent confidence interval:  
0 Inf  
sample estimates:  
odds ratio  
0

Fisher's Exact Test for Count Data

data: X  
p-value = 0.3692  
alternative hypothesis: true odds ratio is not equal to 1  
95 percent confidence interval:  
0.005137618 2.66255556  
sample estimates:  
odds ratio  
0.2571258

-----  
eTable 6:

Fisher's Exact Test for Count Data

data: X  
p-value = 1  
alternative hypothesis: two.sided

Fisher's Exact Test for Count Data

data: X  
p-value = 0.5178  
alternative hypothesis: true odds ratio is not equal to 1  
95 percent confidence interval:  
0.391675 1.547866  
sample estimates:  
odds ratio  
0.7813266

Fisher's Exact Test for Count Data

data: X  
p-value = 0.2081  
alternative hypothesis: two.sided

Fisher's Exact Test for Count Data

data: X  
p-value = 0.6566  
alternative hypothesis: two.sided

Fisher's Exact Test for Count Data

data: X  
p-value = 0.621  
alternative hypothesis: true odds ratio is not equal to 1  
95 percent confidence interval:  
0.006220911 4.214956427  
sample estimates:  
odds ratio  
0.3315117

Fisher's Exact Test for Count Data

data: X  
p-value = 0.366  
alternative hypothesis: two.sided

Fisher's Exact Test for Count Data

data: X  
p-value = 0.827

alternative hypothesis: true odds ratio is not equal to 1  
95 percent confidence interval:  
0.429030 3.006349  
sample estimates:  
odds ratio  
1.126379

Fisher's Exact Test for Count Data

data: X  
p-value = 1  
alternative hypothesis: true odds ratio is not equal to 1  
95 percent confidence interval:  
0 Inf  
sample estimates:  
odds ratio  
0

Fisher's Exact Test for Count Data

data: X  
p-value = 0.3683  
alternative hypothesis: true odds ratio is not equal to 1  
95 percent confidence interval:  
0.004920413 2.549834105  
sample estimates:  
odds ratio  
0.2462462

=====

eTable 4:

Fisher's Exact Test for Count Data

data: X  
p-value = 0.2088  
alternative hypothesis: two.sided

Fisher's Exact Test for Count Data

data: X  
p-value = 0.5058  
alternative hypothesis: two.sided

Fisher's Exact Test for Count Data

data: X  
p-value = 0.2122  
alternative hypothesis: true odds ratio is not equal to 1  
95 percent confidence interval:

0.004234299 1.870659217  
sample estimates:  
odds ratio  
0.2036452

-----  
eTable 7:

Fisher's Exact Test for Count Data

data: X  
p-value = 0.09088  
alternative hypothesis: two.sided

Fisher's Exact Test for Count Data

data: X  
p-value = 0.459  
alternative hypothesis: two.sided

Fisher's Exact Test for Count Data

data: X  
p-value = 0.2113  
alternative hypothesis: true odds ratio is not equal to 1  
95 percent confidence interval:  
0.004054353 1.790964692  
sample estimates:  
odds ratio  
0.1949815

=====  
eTable 8:

Call:

```
coxph(formula = data9 ~ as.factor(cccg2$AGROUP) + as.factor(cccg2$AGE) +  
  as.factor(cccg2$"WBC(100)") + as.factor(cccg2$CNSL) + as.factor(cccg2$"D19MRD(5)") +  
  as.factor(cccg2$"D46MRD(%)") + as.factor(cccg2$BT) + as.factor(cccg2$FRisk))
```

n= 183, number of events= 58

|                                | coef    | exp(coef) | se(coef) | z      | Pr(> z )   |
|--------------------------------|---------|-----------|----------|--------|------------|
| as.factor(cccg2\$AGROUP)2      | 0.9804  | 2.6654    | 0.3118   | 3.144  | 0.00167 ** |
| as.factor(cccg2\$AGE)3         | 0.3632  | 1.4379    | 0.3001   | 1.210  | 0.22623    |
| as.factor(cccg2\$"WBC(100)")2  | 0.8001  | 2.2258    | 0.3018   | 2.651  | 0.00803 ** |
| as.factor(cccg2\$CNSL)2        | -1.1037 | 0.3316    | 0.6531   | -1.690 | 0.09103 .  |
| as.factor(cccg2\$CNSL)3        | 0.4857  | 1.6253    | 0.5683   | 0.855  | 0.39276    |
| as.factor(cccg2\$"D19MRD(5)")4 | -0.4324 | 0.6489    | 0.4377   | -0.988 | 0.32312    |
| as.factor(cccg2\$"D46MRD(%)"2  | 1.0508  | 2.8600    | 0.3815   | 2.754  | 0.00588 ** |
| as.factor(cccg2\$BT)2          | 2.1100  | 8.2479    | 0.7016   | 3.007  | 0.00263 ** |
| as.factor(cccg2\$FRisk)2       | 0.6606  | 1.9360    | 0.6245   | 1.058  | 0.29013    |

---  
Signif. codes: 0 '\*\*\*' 0.001 '\*\*' 0.01 '\*' 0.05 '.' 0.1 ' ' 1



|                                | exp(coef) | exp(-coef) | lower .95 | upper .95 |
|--------------------------------|-----------|------------|-----------|-----------|
| as.factor(cccg2\$AGROUP)2      | 2.6654    | 0.3752     | 1.44663   | 4.911     |
| as.factor(cccg2\$AGE)3         | 1.4379    | 0.6955     | 0.79849   | 2.589     |
| as.factor(cccg2\$"WBC(100)")2  | 2.2258    | 0.4493     | 1.23185   | 4.022     |
| as.factor(cccg2\$CNSL)2        | 0.3316    | 3.0152     | 0.09221   | 1.193     |
| as.factor(cccg2\$CNSL)3        | 1.6253    | 0.6153     | 0.53357   | 4.951     |
| as.factor(cccg2\$"D19MRD(5)")4 | 0.6489    | 1.5410     | 0.27520   | 1.530     |
| as.factor(cccg2\$"D46MRD(%)")2 | 2.8600    | 0.3497     | 1.35395   | 6.041     |
| as.factor(cccg2\$BT)2          | 8.2479    | 0.1212     | 2.08525   | 32.623    |
| as.factor(cccg2\$FRisk)2       | 1.9360    | 0.5165     | 0.56928   | 6.584     |

Concordance= 0.714 (se = 0.039 )  
Likelihood ratio test= 43.65 on 9 df, p=2e-06  
Wald test = 42.65 on 9 df, p=2e-06  
Score (logrank) test = 51.28 on 9 df, p=6e-08

=====

eTable 9:

Fisher's Exact Test for Count Data

data: X  
p-value = 1  
alternative hypothesis: true odds ratio is not equal to 1  
95 percent confidence interval:  
0.2193919 4.4578321  
sample estimates:  
odds ratio  
0.9889463

Fisher's Exact Test for Count Data

data: X  
p-value = 0.8693  
alternative hypothesis: true odds ratio is not equal to 1  
95 percent confidence interval:  
0.5470461 2.2128220  
sample estimates:  
odds ratio  
1.098484

Fisher's Exact Test for Count Data

data: X  
p-value = 1  
alternative hypothesis: true odds ratio is not equal to 1  
95 percent confidence interval:  
0.282847 3.455936  
sample estimates:  
odds ratio  
0.988695

Fisher's Exact Test for Count Data

data: X  
p-value = 1  
alternative hypothesis: true odds ratio is not equal to 1  
95 percent confidence interval:  
0.3079302 3.1734088  
sample estimates:  
odds ratio  
0.9885651

Fisher's Exact Test for Count Data

data: X  
p-value = 1  
alternative hypothesis: true odds ratio is not equal to 1  
95 percent confidence interval:  
0.1784304 5.4824155  
sample estimates:  
odds ratio  
0.9890678

Fisher's Exact Test for Count Data

data: X  
p-value = 1  
alternative hypothesis: true odds ratio is not equal to 1  
95 percent confidence interval:  
0.01248028 78.44060169  
sample estimates:  
odds ratio  
0.9894168

Fisher's Exact Test for Count Data

data: X  
p-value = 0.621  
alternative hypothesis: true odds ratio is not equal to 1  
95 percent confidence interval:  
0.00821465 9.58568321  
sample estimates:  
odds ratio  
0.4911521

Fisher's Exact Test for Count Data

data: X  
p-value = 0.4443  
alternative hypothesis: true odds ratio is not equal to 1  
95 percent confidence interval:

0.04293692 3.48426381  
sample estimates:  
odds ratio  
0.4856741

#### Fisher's Exact Test for Count Data

data: X  
p-value = 1  
alternative hypothesis: true odds ratio is not equal to 1  
95 percent confidence interval:  
0.01248028 78.44060169  
sample estimates:  
odds ratio  
0.9894168

# The R Code

```

#=====
# Based on the MS outline determined by the study PI/team in accordance with the study protocol,
# the analyses are modularized according to tables and figures. A few clean and confirmed datasets
# are generated from the master data file. In each analysis the dataset (in Excel format) for the
# module is loaded into RStudio via GUI, and the computation is carried out by "select-and-run."
# The run-time printout of function calls and results (the file 'R_code_JAMAO_logFile.txt')
# was generated by bracketing the code lines below with the pair of commands sink(file) and sink().
#=====
# sink(file='WhereUwant2putTheLog')
library(survival)
library(survminer)
library(cmprsk)
#Figure 2 intent to treat (data: cccg1.xlsx)
# Panel A
data1<-Surv(cccg1$Time2EFSY,cccg1$sensor2)
lr<-survdiff(data1~cccg1$IGroup)
lr
cat("-----\n")
lr1<-survfit(data1~cccg1$IGroup)
summary(lr1)
ggsurvplot(lr1,data=cccg1,xlim=c(0,4),ncensor.plot=TRUE,ylab="Event-free Survival",xlab="Time from
diagnosis(years)",
          risk.table= TRUE,legend=c(0.3,0.4),legend.title=" ",risk.table.y.text.col=F)
# HR and CI
data1<-Surv(cccg1$Time2EFSY,cccg1$sensor2)
cox1<-coxph(data1~as.factor(cccg1$IGroup))
summary(cox1)
cat("=====\n")
# Panel B
data1<-Surv(cccg1$Time2OSY,cccg1$OS)
lr<-survdiff(data1~cccg1$IGroup)
lr
cat("-----\n")
lr1<-survfit(data1~cccg1$IGroup)
summary(lr1)
ggsurvplot(lr1,data=cccg1,xlim=c(0,4),ncensor.plot=TRUE,ylab="Overall Survival",xlab="Time from
diagnosis(years)",
          risk.table= TRUE,legend=c(0.3,0.4),legend.title=" ",risk.table.y.text.col=F)
# HR and CI
data1<-Surv(cccg1$Time2OSY,cccg1$OS)
cox1<-coxph(data1~as.factor(cccg1$IGroup))
summary(cox1)
cat("=====\n\n")

#Figure 3 (Data: cccg1comp.xlsx)
# Panel A
{
  Z <- cuminc(cccg1comp$time2efs,cccg1comp$'any R',group=cccg1comp$IGROUP)
  print(Z)
  Est <- timepoints(Z, times=3.9)
  print(Est)
  print(Z$Tests)
  time0 <- Z$"1 1"$time
  est0 <- Z$"1 1"$est
  time1 <- Z$"2 1"$time
}

```

```

est1 <- Z$"2 1"$est
plot(time0,est0,main="Cumulative Risk Any Relapse",col=c('blue'),xlab="Time from
diagnosis(years)",ylab="probability",type="l",
      xlim=c(0,4.5),ylim=c(0,0.35))
lines(time1,est1,col=c('red'))
legend(c(0.1,1),c(0.2,0.14), c("Imatinib","Dasatinib"),pch="-",col=c('red','blue'))
}
cat("-----\n")
# Panel B
{
  Z <- cuminc(cccg1comp$time2efs,cccg1comp$'Isolated CNS R',group=cccg1comp$IGROUP)
  print(Z)
  Est <- timepoints(Z, times=3.9)
  print(Est)
  print(Z$Tests)
  time0 <- Z$"1 1"$time
  est0 <- Z$"1 1"$est
  time1 <- Z$"2 1"$time
  est1 <- Z$"2 1"$est
  plot(time0,est0,main=" Cumulative Risk Isolated CNS Relapse ",col=c('blue'),xlab="Time from
diagnosis(years)",ylab="probability",
        type="l",xlim=c(0,4.5),ylim=c(0,0.35))
  lines(time1,est1,col=c('red'))
  legend(c(0.1,1),c(0.2,0.14), c("Imatinib","Dasatinib"),pch="-",col=c('red','blue'))
}
cat("-----\n")
# Panel C
{
  Z <- cuminc(cccg1comp$time2efs,cccg1comp$'R involving CNS',group=cccg1comp$IGROUP)
  print(Z)
  Est <- timepoints(Z, times=3.9)
  print(Est)
  print(Z$Tests)
  time0 <- Z$"1 1"$time
  est0 <- Z$"1 1"$est
  time1 <- Z$"2 1"$time
  est1 <- Z$"2 1"$est
  plot(time0,est0,main=" Cumulative Risk Any CNS Relapse ",col=c('blue'),xlab="Time from
diagnosis(years)",ylab="probability",
        type="l",xlim=c(0,4.5),ylim=c(0,0.35))
  lines(time1,est1,col=c('red'))
  legend(c(0.1,1),c(0.2,0.14), c("Imatinib","Dasatinib"),pch="-",col=c('red','blue'))
}
cat("-----\n")
# Panel D
{
  Z <- cuminc(cccg1comp$time2efs,cccg1comp$'Death in remission',group=cccg1comp$IGROUP)
  print(Z)
  Est <- timepoints(Z, times=3.9)
  print(Est)
  print(Z$Tests)
  time0 <- Z$"1 1"$time
  est0 <- Z$"1 1"$est
  time1 <- Z$"2 1"$time
  est1 <- Z$"2 1"$est

```

```

plot(time0,est0,main=" Cumulative Risk Death in Remission",col=c('blue'),xlab="Time from
diagnosis(years)",ylab="probability",
      type="l",xlim=c(0,4.5),ylim=c(0,0.35))
lines(time1,est1,col=c('red'))
legend(c(0.1,1),c(0.2,0.14), c("Imatinib","Dasatinib"),pch="-",col=c('red','blue'))
}
cat("=====\n\n\n")

# eFigure 1 (Dara: cccg1.xlsx)
#Panel A
data1<-Surv(cccg1$Time2EFSY,cccg1$Censor1)
lr<-survdiff(data1~cccg1$AGroup)
lr
cat("-----\n")
lr1<-survfit(data1~cccg1$AGroup)
summary(lr1)
ggsurvplot(lr1,data=cccg1,xlim=c(0,4),ncensor.plot=TRUE,ylab="Event-free Survival",xlab="Time from
diagnosis(years)",
           risk.table= TRUE,legend=c(0.3,0.4),legend.title=" ",risk.table.y.text.col=F)
data1<-Surv(cccg1$Time2EFSY,cccg1$Censor1)
cox1<-coxph(data1~as.factor(cccg1$AGroup))
summary(cox1)
cat("=====\n")
# Panel B
data1<-Surv(cccg1$Time2OSY,cccg1$OS)
lr<-survdiff(data1~cccg1$AGroup)
lr
cat("-----\n")
lr1<-survfit(data1~cccg1$AGroup)
summary(lr1)
ggsurvplot(lr1,data=cccg1,xlim=c(0,4),ncensor.plot=TRUE,ylab="Overall Survival",xlab="Time from
diagnosis(years)",
           risk.table= TRUE,legend=c(0.3,0.4),legend.title=" ",risk.table.y.text.col=F)
data1<-Surv(cccg1$Time2OSY,cccg1$OS)
cox1<-coxph(data1~as.factor(cccg1$AGroup))
summary(cox1)
cat("=====\n\n\n")

# eFigure 2 (Data: cccg1comp.xlsx)
#Panel A
{
  Z <- cuminc(cccg1comp$time2efs,cccg1comp$any R',group=cccg1comp$AGROUP)
  print(Z)
  Est <- timepoints(Z, times=3.9)
  print(Est)
  print(Z$Tests)
  time0 <- Z$1 1"$time
  est0 <- Z$1 1"$est
  time1 <- Z$2 1"$time
  est1 <- Z$2 1"$est
  plot(time0,est0,main="Cumulative Risk Any Relapse",col=c('blue'),xlab="Time from
diagnosis(years)",ylab="probability",
       type="l",xlim=c(0,4.5),ylim=c(0,0.35))
  lines(time1,est1,col=c('red'))
  legend(c(0.1,1),c(0.2,0.14), c("Imatinib","Dasatinib"),pch="-",col=c('red','blue'))
}

```

```

}
cat("-----\n")
# Panel B
{
  Z <- cuminc(cccg1comp$time2efs,cccg1comp$'Isolated CNS R',group=cccg1comp$AGROUP)
  print(Z)
  Est <- timepoints(Z, times=3.9)
  print(Est)
  print(Z$Tests)
  time0 <- Z$"1 1"$time
  est0 <- Z$"1 1"$est
  time1 <- Z$"2 1"$time
  est1 <- Z$"2 1"$est
  plot(time0,est0,main=" Cumulative Risk Isolated CNS Relapse ",col=c('blue'),xlab="Time from
diagnosis(years)",ylab="probability",
      type="l",xlim=c(0,4.5),ylim=c(0,0.35))
  lines(time1,est1,col=c('red'))
  legend(c(0.1,1),c(0.2,0.14), c("Imatinib","Dasatinib"),pch="-",col=c('red','blue'))
}
cat("-----\n")
# Panel C
{
  Z <- cuminc(cccg1comp$time2efs,cccg1comp$'R involving CNS',group=cccg1comp$AGROUP)
  print(Z)
  Est <- timepoints(Z, times=3.9)
  print(Est)
  print(Z$Tests)
  time0 <- Z$"1 1"$time
  est0 <- Z$"1 1"$est
  time1 <- Z$"2 1"$time
  est1 <- Z$"2 1"$est
  plot(time0,est0,main=" Cumulative Risk Any CNS Relapse ",col=c('blue'),xlab="Time from
diagnosis(years)",ylab="probability",
      type="l",xlim=c(0,4.5),ylim=c(0,0.35))
  lines(time1,est1,col=c('red'))
  legend(c(0.1,1),c(0.2,0.14), c("Imatinib","Dasatinib"),pch="-",col=c('red','blue'))
}
cat("-----\n")
# Panel D
{
  Z <- cuminc(cccg1comp$time2efs,cccg1comp$'Death in remission',group=cccg1comp$AGROUP)
  print(Z)
  Est <- timepoints(Z, times=3.9)
  print(Est)
  print(Z$Tests)
  time0 <- Z$"1 1"$time
  est0 <- Z$"1 1"$est
  time1 <- Z$"2 1"$time
  est1 <- Z$"2 1"$est
  plot(time0,est0,main=" Cumulative Risk Death in Remission",col=c('blue'),xlab="Time from
diagnosis(years)",ylab="probability",
      type="l",xlim=c(0,4.5),ylim=c(0,0.35))
  lines(time1,est1,col=c('red'))
  legend(c(0.1,1),c(0.2,0.14), c("Imatinib","Dasatinib"),pch="-",col=c('red','blue'))
}
cat("=====\n\n\n")

```



```

# Table 1, Multivariate (Data: cccg2.xlsx)
cat(" Table 1:\n")
data9<-Surv(cccg2$Time2EFSY,cccg2$Censor2)
cox2<-coxph(data9~as.factor(cccg2$IGROUP)+as.factor(cccg2$AGE)+as.factor(cccg2$WBC(100))
      +as.factor(cccg2$CNSL)+as.factor(cccg2$D19MRD(5))+as.factor(cccg2$D46MRD(%))
      +as.factor(cccg2$BT)+as.factor(cccg2$FRisk))
summary(cox2)
cat("===== \n\n\n")

```

```

# eTable 5, Univariate (Data: cccg1D.xlsx/ cccg1I.xlsx)

```

```

#Imatinib
cat(" eTable 5, Imatinib\n")
data<-Surv(cccg1I$Time2EFSY,cccg1I$Censor2)
cox1<-coxph(data~as.factor(cccg1I$AGE))
summary(cox1)
cox1<-coxph(data~as.factor(cccg1I$SEX))
summary(cox1)
cox1<-coxph(data~as.factor(cccg1I$WBC(100)))
summary(cox1)
cox1<-coxph(data~as.factor(cccg1I$CNSL))
summary(cox1)
cox1<-coxph(data~as.factor(cccg1I$BT))
summary(cox1)
cox1<-coxph(data~as.factor(cccg1I$P190/210))
summary(cox1)
cox1<-coxph(data~as.factor(cccg1I$FRisk))
summary(cox1)
cox1<-coxph(data~as.factor(cccg1I$D19MRD(5)))
summary(cox1)
cox1<-coxph(data~as.factor(cccg1I$D46MRD(%)))
summary(cox1)
cat("-----\n")

```

```

#Dasatinib
cat(" eTable 5, Dasatinib\n")
data<-Surv(cccg1D$Time2EFSY,cccg1D$Censor2)
cox1<-coxph(data~as.factor(cccg1D$AGE))
summary(cox1)
cox1<-coxph(data~as.factor(cccg1D$SEX))
summary(cox1)
cox1<-coxph(data~as.factor(cccg1D$WBC(100)))
summary(cox1)
cox1<-coxph(data~as.factor(cccg1D$CNSL))
summary(cox1)
cox1<-coxph(data~as.factor(cccg1D$BT))
summary(cox1)
cox1<-coxph(data~as.factor(cccg1D$P190/210))
summary(cox1)
cox1<-coxph(data~as.factor(cccg1D$FRisk))
summary(cox1)
cox1<-coxph(data~as.factor(cccg1D$D19MRD(5)))
summary(cox1)
cox1<-coxph(data~as.factor(cccg1D$D46MRD(%)))
summary(cox1)
cat("===== \n\n\n")

```

```

# eTable 3, eTable 6 (Data: cccg-table1.xlsx)
# eTable 3
{
cat(" eTable 3:\n")
# Age
X <- matrix(c(1,63,33,0,63,29),3,2)
Z <- fisher.test(X)
print(Z)
# Sex
X <- matrix(c(70,27,66,26),2,2)
Z <- fisher.test(X)
print(Z)
# WBC
X <- matrix(c(32,20,45,43,12,37),3,2)
Z <- fisher.test(X)
print(Z)
# CNS
X<- matrix(c(87,7,3,83,6,3),3,2)
Z <- fisher.test(X)
print(Z)
# Lineage
X <- matrix(c(95,2,90,2),2,2)
Z <- fisher.test(X)
print(Z)
# t(9;22)
X<- matrix(c(1,5,91,5,9,78),3,2)
Z <- fisher.test(X)
print(Z)
# BCR-ABL
X <- matrix(c(65,14,62,10),2,2)
Z <- fisher.test(X)
print(Z)
# Initial risk
X <- matrix(c(97,0,92,0),2,2)
Z <- fisher.test(X)
print(Z)
# Final risk
X <- matrix(c(93,4,91,1),2,2)
Z <- fisher.test(X)
print(Z)
}
cat("-----\n")
# eTable 6
{
cat(" eTable 6:\n")
# Age
X <- matrix(c(1,63,31,0,63,31),3,2)
Z <- fisher.test(X)
print(Z)
# Sex
X <- matrix(c(66,29,70,24),2,2)
Z <- fisher.test(X)
print(Z)
# WBC

```

```

X <- matrix(c(32,19,44,43,13,38),3,2)
Z <- fisher.test(X)
print(Z)
# CNS
X<- matrix(c(87,6,2,83,7,4),3,2)
Z <- fisher.test(X)
print(Z)
# Lineage
X <- matrix(c(92,3,93,1),2,2)
Z <- fisher.test(X)
print(Z)
# t(9;22)
X<- matrix(c(2,5,88,4,9,81),3,2)
Z <- fisher.test(X)
print(Z)
# BCR-ABL
X <- matrix(c(62,11,65,13),2,2)
Z <- fisher.test(X)
print(Z)
# Initial risk
X <- matrix(c(95,0,94,0),2,2)
Z <- fisher.test(X)
print(Z)
# final risk
X <- matrix(c(91,4,93,1),2,2)
Z <- fisher.test(X)
print(Z)
}
cat("=====\\n\\n\\n")

# eTable 4, eTable 7 (Data: MRD-CR.xlsx)
# eTable 4
{
cat(" eTable 4:\\n")
X <- matrix(c(28,42,8,18,37,37,9,9),4,2)
Z <- fisher.test(X)
print(Z)
X <- matrix(c(72,17,4,73,17,1),3,2)
Z <- fisher.test(X)
print(Z)
X <- matrix(c(92,5,91,1),2,2)
Z <- fisher.test(X)
print(Z)
}
cat("-----\\n")
# eTable 7
{
cat(" eTable 7:\\n")
#D19 MRD
X <- matrix(c(27,40,8,19,38,39,9,8),4,2)
Z <- fisher.test(X)
print(Z)
# D46 MRD
X <- matrix(c(70,17,4,75,17,1),3,2)
Z <- fisher.test(X)
print(Z)
}

```

```

# CR end of induction
X <- matrix(c(90,5,93,1),2,2)
Z <- fisher.test(X)
print(Z)
}
cat("=====\n\n\n")

# eTable 8 (DATA: cccg2.xlsx)
cat(" eTable 8:\n")
data9<-Surv(cccg2$Time2EFSY,cccg2$censor1)
cox2<-coxph(data9~as.factor(cccg2$AGROUP)+as.factor(cccg2$AGE)+as.factor(cccg2$WBC(100))
+as.factor(cccg2$CNSL)+as.factor(cccg2$D19MRD(5))+as.factor(cccg2$D46MRD(%))
+as.factor(cccg2$BT)+as.factor(cccg2$FRisk))
summary(cox2)
cat("=====\n\n\n")

# eTable 9 (Data: AE.xlsx)
{
  cat(" eTable 9:\n")
# Grade 5 infection
X <- matrix(c(5,90,5,89),2,2)
Z <- fisher.test(X)
print(Z)
#Grade 3/4 infection:
X <- matrix(c(26,69,24,70),2,2)
Z <- fisher.test(X)
print(Z)
# Fungal
X <- matrix(c(7,88,7,87),2,2)
Z <- fisher.test(X)
print(Z)
# Pancreatitis
X <- matrix(c(8,87,8,86),2,2)
Z <- fisher.test(X)
print(Z)
#Seizure
X <- matrix(c(4,91,4,90),2,2)
Z <- fisher.test(X)
print(Z)
# Thrombosis
X <- matrix(c(1,94,1,93),2,2)
Z <- fisher.test(X)
print(Z)
# Intestinal hemorrhage
X <- matrix(c(1,94,2,92),2,2)
Z <- fisher.test(X)
print(Z)
# Pleural effusion
X <- matrix(c(2,93,4,90),2,2)
Z <- fisher.test(X)
print(Z)
# Hyperbilli
X <- matrix(c(1,94,1,93),2,2)
Z <- fisher.test(X)
print(Z)
}

```

#Close the sink()  
#sink()
