# Supplementary material
Source: PubMed Central journal article supplement (PMC6990720)
Supplement: jamaoncol-6-358-s004.pdf [file jamaoncol-6-358-s004.pdf]

## Data Sharing Statement

Shen. Effect of Dasatinib vs Imatinib in the Treatment of Pediatric Philadelphia Chromosome-Positive Acute Lymphoblastic Leukemia. *JAMA Oncol*. Published January 16, 2020.  
10.1001/jamaoncol.2019.5868

### Data

**Data available:** Yes

**Data types:** Deidentified participant data

**How to access data:** [caijiaoyang@scmc.com.cn](mailto:caijiaoyang@scmc.com.cn)

**When available:** With publication

### Supporting Documents

**Document types:** Informed consent form

**How to access documents:** [caijiaoyang@scmc.com.cn](mailto:caijiaoyang@scmc.com.cn)

**When available:** With publication

### Additional Information

**Who can access the data:** anyone requesting the data

**Types of analyses:** for a specified purpose

**Mechanisms of data availability:** signed data access agreement
